# Supplementary material for: Palladium-catalyzed ortho-C–H alkenylation of 2-benzyl-1,2,3-triazoles
Source: Royal Society of Chemistry journal article supplement (doi:10.1039/c5ob00973a), 2015-01-01

## Supporting Information

### Palladium-catalyzed *ortho*-C-H Alkenylation of 2-benzyl-1,2,3-triazoles

Ping He,<sup>a</sup> Qingshan Tian,<sup>a</sup> and Chunxiang Kuang<sup>a,b,\*</sup>

<sup>a</sup> Department of Chemistry, Tongji University, Siping Road 1239, Shanghai 200092, China  
E-mail: [kuangcx@tongji.edu.cn](mailto:kuangcx@tongji.edu.cn)

<sup>b</sup> Shanghai Key Lab of Chemical Assessment and Sustainability, Department of Chemistry, Tongji University

#### List of the Contents

|                                                                         |    |
|-------------------------------------------------------------------------|----|
| General Experimental.....                                               | S1 |
| General Procedure for preparation of substrates.....                    | S2 |
| General Procedure for the alkenylation of 2-benzyl-1,2,3-triazoles..... | S3 |
| Spectroscopic and Analytical Data of New Compounds.....                 | S4 |
| Spectra of the compounds.....                                           | S9 |

#### General Experimental Details:

All glassware was oven or flame dried immediately prior to use. All solvents were purified and dried according to standard methods prior to use, unless stated otherwise. All reagents were obtained from commercial sources and used without further purification. Thin-layer chromatography (TLC) was performed using 60 mesh silica gel plates visualized with short-wavelength UV light (254 nm). Silica gel 60 (230-400 mesh) was used for column chromatography. <sup>1</sup>H NMR spectra were obtained at 400 MHz and recorded relative to the tetramethylsilane signal (0 ppm) or residual protio-solvent. <sup>13</sup>C NMR spectra were obtained at 100 MHz, and chemical shifts were recorded relative to the solvent resonance (CDCl<sub>3</sub>, 77.0 ppm). Data for <sup>1</sup>H NMR are recorded as follows: chemical shift (δ, ppm), multiplicity (s = singlet, d = doublet, t = triplet, q = quartet, m = multiplet or unresolved, br = broad singlet, coupling constant(s) in Hz, integration). Data for <sup>13</sup>C NMR are reported in terms of chemical shift (δ, ppm). IR spectra were recorded on a Nicolet FT-IR spectrometer and only major peaks are reported in cm<sup>-1</sup>. High resolution mass spectra were obtained using an Agilent 6210 Series TOF LC-MS equipped with electrospray ionization (ESI) probe operating in positive ion mode. Melting points were measured with SGW-4 micro melting point apparatus without further correction.

## General Procedure for preparation of substrates

All of compounds in Table 2 were synthesized according to the literature, and the NMR spectroscopy were consisted with those data.<sup>1,2</sup>

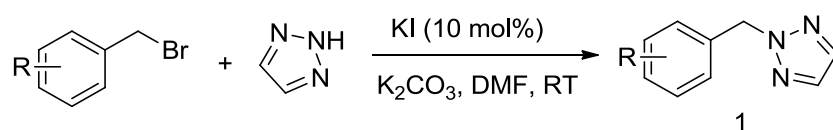

## General Procedure for the alkenylation of 2-benzyl-1,2,3-triazoles

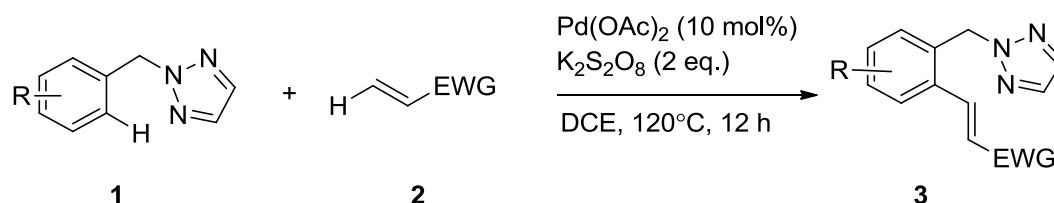

An oven-dried 15 mL screw-capped vial containing 1 (0.2 mmol, 1.0 equiv), 2 (0.4 mmol, 2.0 equiv), Pd(OAc)<sub>2</sub> (0.02 mmol, 0.1 equiv) and K<sub>2</sub>S<sub>2</sub>O<sub>8</sub> (0.4 mmol, 2.0 equiv) in DCE (2 mL). The reaction mixture was stirred at 120 °C for 12 h. After cooling to room temperature, the solvent was evaporated and then the residue was purified on a silica gel column using petroleum ether /ethyl acetate (10/1) as eluent to give the desired products.

## The data of characterization

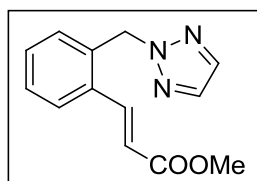

### (E)-methyl 3-(2-((2H-1,2,3-triazol-2-yl)methyl)phenyl)acrylate (3a)

Colorless oil; <sup>1</sup>H NMR (400 MHz, CDCl<sub>3</sub>) δ 8.15 (d, *J* = 15.8 Hz, 1H), 7.63 (m, 3H), 7.39 (dd, *J* = 5.1, 3.9 Hz, 2H), 7.23-7.21 (m, 1H), 6.40 (d, *J* = 15.8 Hz, 1H), 5.77 (s, 2H), 3.84 (s, 3H); <sup>13</sup>C NMR (101 MHz, CDCl<sub>3</sub>) δ 166.9, 141.1, 134.7, 134.1, 133.7, 130.3, 129.9, 129.0, 127.2, 121.0, 55.8, 51.8; IR: max (thin film) (cm<sup>-1</sup>)= 2949, 1718, 1677, 1637, 1556, 1513, 1415, 1237, 1156, 1021, 962, 816, 737, 612; HRMS (ESI-TOF) *m/z*: calcd for C<sub>13</sub>H<sub>13</sub>N<sub>3</sub>O<sub>2</sub>: 243.1008 found: 243.1009

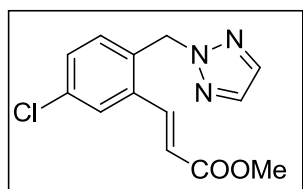

### (E)-methyl 3-(2-((2H-1,2,3-triazol-2-yl)methyl)-5-chlorophenyl)acrylate (3b)

Colorless oil; <sup>1</sup>H NMR (400 MHz, CDCl<sub>3</sub>) δ 8.07 (d, *J* = 15.7 Hz, 1H), 7.69 - 7.55 (m, 3H), 7.35 (d, *J* = 6.4 Hz, 1H), 7.17 (d, *J* = 8.3 Hz, 1H), 6.40 (d, *J* = 15.8 Hz, 1H), 5.72 (s, 2H), 3.84 (s, 3H). ); <sup>13</sup>C NMR (101 MHz, CDCl<sub>3</sub>) δ 166.5, 139.8, 135.5, 135.1, 134.8, 132.4, 131.4, 130.2, 127.1, 122.3, 55.18, 52.0; IR: max (thin film) (cm<sup>-1</sup>)= 3020, 2949, 1728, 1667, 1645, 1565, 1552, 1531, 1448, 1233, 1142, 1019, 962, 816, 732, 623; HRMS (ESI-TOF) *m/z* calcd for C<sub>13</sub>H<sub>12</sub>ClN<sub>3</sub>O<sub>2</sub>: 277.0618 found: 277.0619

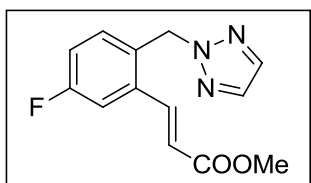

**(E)-methyl 3-(2-((2H-1,2,3-triazol-2-yl)methyl)-5-fluorophenyl)acrylate (3c)**

Yellow oil;  $^1\text{H}$  NMR (400 MHz,  $\text{CDCl}_3$ )  $\delta$  8.12 (d,  $J = 15.8$  Hz, 1H), 7.63 (s, 2H), 7.43 (s, 1H), 7.18 (dd,  $J = 21.3, 7.8$  Hz, 2H), 6.39 (d,  $J = 15.8$  Hz, 1H), 5.72 (s, 2H), 3.83 (s, 3H);  $^{13}\text{C}$  NMR (100 MHz,  $\text{CDCl}_3$ )  $\delta$  166.5, 162.7, 140.0, 136.0, 134.7, 132.1, 129.9, 122.1, 117.2, 113.7, 55.1, 51.9; IR: max (thin film) ( $\text{cm}^{-1}$ ) = 3018, 2949, 1730, 1666, 1623, 1592, 1578, 1532, 1458, 1228, 1141, 1023, 962, 888, 732, 640; HRMS (ESI-TOF)  $m/z$ : calcd for  $\text{C}_{13}\text{H}_{12}\text{FN}_3\text{O}_2$ : 261.0914 found: 261.0914

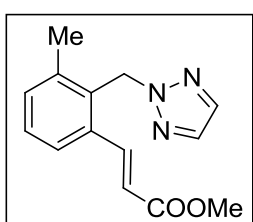

**(E)-methyl 3-(2-((2H-1,2,3-triazol-2-yl)methyl)-3-methylphenyl)acrylate (3d)**

Yellow oil;  $^1\text{H}$  NMR (400 MHz,  $\text{CDCl}_3$ )  $\delta$  8.33 (d,  $J = 15.7$  Hz, 1H), 7.61 (s, 2H), 7.48 (d,  $J = 7.1$  Hz, 1H), 7.32 – 7.28 (m, 2H), 6.38 (d,  $J = 15.7$  Hz, 1H), 5.75 (s, 2H), 3.83 (s, 3H), 2.46 (s, 3H);  $^{13}\text{C}$  NMR (100 MHz,  $\text{CDCl}_3$ )  $\delta$  167.0, 142.7, 139.0, 135.7, 134.2, 133.7, 132.4, 131.7, 129.1, 125.2, 121.4, 51.8, 19.9; IR: max (thin film) ( $\text{cm}^{-1}$ ) = 3060, 2941, 2790, 2358, 1745, 1687, 1621, 1558, 1435, 1125, 1060, 962, 855, 712, 610; HRMS (ESI-TOF)  $m/z$ : calcd for  $\text{C}_{14}\text{H}_{15}\text{N}_3\text{O}_2$ : 257.1164 found: 257.1165

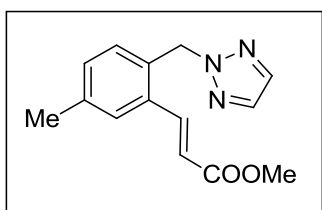

**(E)-methyl 3-(2-((2H-1,2,3-triazol-2-yl)methyl)-5-methylphenyl)acrylate (3e)**

Yellow oil;  $^1\text{H}$  NMR (400 MHz,  $\text{CDCl}_3$ )  $\delta$  8.12 (d,  $J = 15.8$  Hz, 1H), 7.63 (s, 2H), 7.43 (s, 1H), 7.20 (d,  $J = 7.8$  Hz, 1H), 7.15 (d,  $J = 7.8$  Hz, 1H), 6.39 (d,  $J = 15.8$  Hz, 1H), 5.72 (s, 2H), 3.83 (s, 3H), 2.37 (s, 3H);  $^{13}\text{C}$  NMR (101 MHz,  $\text{CDCl}_3$ )  $\delta$  167.0, 141.3, 138.9, 134.6, 133.6, 131.2, 131.2, 130.2, 127.7, 120.6, 55.6, 51.8, 21.2. IR: max (thin film) ( $\text{cm}^{-1}$ ) = 3065, 2979, 2792, 2388, 1749, 1686, 1626, 1540, 1425, 1176, 1053, 962, 853, 772, 630; HRMS (ESI-TOF)  $m/z$ : calcd for  $\text{C}_{14}\text{H}_{15}\text{N}_3\text{O}_2$ : 257.1164 found: 257.1165

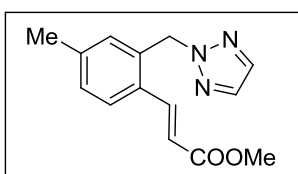

**(E)-methyl 3-(2-((2H-1,2,3-triazol-2-yl)methyl)-4-methylphenyl)acrylate (3f)**

Yellow oil. <sup>1</sup>H NMR (400 MHz, CDCl<sub>3</sub>) δ 8.12 (d, *J* = 15.7 Hz, 1H), 7.65 (s, 2H), 7.54 (d, *J* = 8.0 Hz, 1H), 7.28 (s, 1H), 7.04 (s, 1H), 6.37 (d, *J* = 15.7 Hz, 1H), 5.74 (s, 2H), 3.83 (s, 3H), 2.36 (s, 3H); <sup>13</sup>C NMR (101 MHz, CDCl<sub>3</sub>) δ 167.1, 141.0, 140.8, 134.6, 133.9, 130.9, 130.7, 129.9, 127.1, 119.8, 55.8, 51.8, 21.4. IR: max (thin film) (cm<sup>-1</sup>) = 3055, 2994, 2796, 2384, 1753, 1675, 1632, 1552, 1435, 1180, 1037, 962, 885, 770, 632; HRMS (ESI-TOF) *m/z*: calcd for C<sub>14</sub>H<sub>15</sub>N<sub>3</sub>O<sub>2</sub>: 257.1164 found: 257.1165

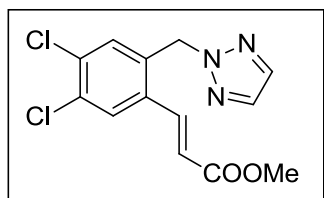

**(E)-methyl 3-(2-((2H-1,2,3-triazol-2-yl)methyl)-4,5-dichlorophenyl)acrylate (3g)**

Yellow oil. <sup>1</sup>H NMR (400 MHz, CDCl<sub>3</sub>) δ 8.01 (d, *J* = 15.8 Hz, 1H), 7.68 (d, *J* = 5.4 Hz, 2H), 7.29 (d, *J* = 7.1 Hz, 2H), 6.39 (d, *J* = 15.8 Hz, 1H), 5.70 (s, 2H), 3.84 (s, 3H); <sup>13</sup>C NMR (101 MHz, CDCl<sub>3</sub>) δ 166.3, 138.8, 135.0, 134.2, 133.7, 133.4, 131.7, 128.8, 122.6, 54.73, 52.0, 29.7; IR: max (thin film) (cm<sup>-1</sup>) = 3017, 2949, 1738, 1677, 1650, 1536, 1542, 1521, 1458, 1220, 1160, 1029, 962, 817, 731, 628; HRMS (ESI-TOF) *m/z*: calcd for C<sub>13</sub>H<sub>11</sub>Cl<sub>2</sub>N<sub>3</sub>O<sub>2</sub>: 311.0228 found: 311.0227

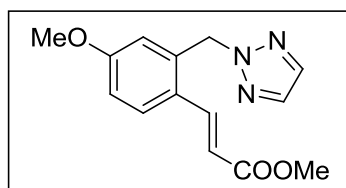

**(E)-methyl 3-(2-((2H-1,2,3-triazol-2-yl)methyl)-4-methoxyphenyl)acrylate (3h)**

White solid; m.p. 125 °C; <sup>1</sup>H NMR (400 MHz, CDCl<sub>3</sub>) δ 8.09 (d, *J* = 15.7 Hz, 1H), 7.65 (d, *J* = 11.8 Hz, 2H), 7.61 (d, *J* = 8.7 Hz, 1H), 6.90 (dd, *J* = 8.7, 2.5 Hz, 1H), 6.66 (t, *J* = 6.1 Hz, 1H), 6.32 (d, *J* = 15.7 Hz, 1H), 5.76 (s, 2H), 3.81 (d, *J* = 7.8 Hz, 6H); <sup>13</sup>C NMR (101 MHz, CDCl<sub>3</sub>) δ 167.3, 161.2, 140.5, 136.0, 134.7, 128.7, 125.9, 118.4, 114.9, 114.6, 55.8, 55.4, 51.8; IR: max (thin film) (cm<sup>-1</sup>) = 2949, 2918, 2846, 1716, 1637, 1604, 1574, 1500, 1435, 1294, 1288, 1238, 1194, 1178, 1036, 962, 816, 777; HRMS (ESI-TOF) *m/z*: calcd for C<sub>14</sub>H<sub>15</sub>N<sub>3</sub>O<sub>3</sub>: 273.1113 found: 273.1114

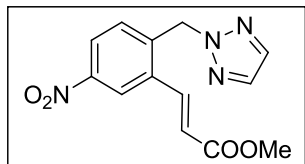

**(E)-methyl 3-(2-((2H-1,2,3-triazol-2-yl)methyl)-5-nitrophenyl)acrylate (3i)**

Yellow solid; m.p. 82 °C; <sup>1</sup>H NMR (400 MHz, CDCl<sub>3</sub>) δ 8.45 (d, *J* = 2.1 Hz, 1H), 8.24 – 8.17 (m, 1H), 8.09 (d, *J* = 15.7 Hz, 1H), 7.69 (s, 2H), 7.29 (d, *J* = 2.6 Hz, 1H), 6.54 (d, *J* = 15.8 Hz, 1H), 5.84 (s, 2H), 3.87 (s, 3H); <sup>13</sup>C NMR (101 MHz, CDCl<sub>3</sub>) δ 166.1, 148.2, 140.4, 138.7, 135.2, 130.7, 128.7, 124.4, 124.0, 122.1, 55.1, 52.1; IR: max (thin film) (cm<sup>-1</sup>) = 2949, 1718, 1637, 1525, 1435, 1348, 1281, 1172, 1174, 962, 817, 731; HRMS (ESI-TOF) *m/z*: calcd for C<sub>13</sub>H<sub>12</sub>N<sub>4</sub>O<sub>4</sub>: 288.0859 found: 288.0859

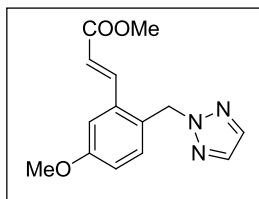

**(E)-methyl 3-(2-((2H-1,2,3-triazol-2-yl)methyl)-5-methoxyphenyl)acrylate (3j)**

Yellow solid; m.p. 113 °C; <sup>1</sup>H NMR (400 MHz, CDCl<sub>3</sub>) δ 8.13 (d, *J* = 15.8 Hz, 1H), 7.63 (s, 2H), 7.26 (d, *J* = 8.5 Hz, 1H), 7.12 (d, *J* = 2.6 Hz, 1H), 6.94 (d, *J* = 8.5, 2.6 Hz, 1H), 6.38 (d, *J* = 15.7 Hz, 1H), 5.69 (s, 2H), 3.84 (d, *J* = 1.4 Hz, 6H); <sup>13</sup>C NMR (101 MHz, CDCl<sub>3</sub>) δ 166.9, 159.9, 141.3, 135.1, 134.5, 131.8, 129.6, 126.4, 121.1, 116.1, 112.1, 55.3, 51.9. IR: max (thin film) (cm<sup>-1</sup>)= 2949, 2922, 2843, 1730, 1628, 1600, 1576, 1498, 1433, 1292, 1286, 1240, 1200, 1177, 1045, 962, 816, 767; HRMS (ESI-TOF) *m/z*: calcd for C<sub>14</sub>H<sub>15</sub>N<sub>3</sub>O<sub>3</sub>: 273.1113 found: 273.1115

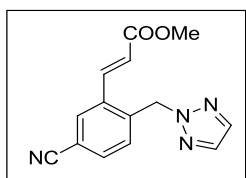

**(E)-methyl 3-(2-((2H-1,2,3-triazol-2-yl)methyl)-5-cyanophenyl)acrylate (3k)**

Brown solid; m.p. 124 °C; <sup>1</sup>H NMR (400 MHz, CDCl<sub>3</sub>) δ 8.05 (d, *J* = 15.8 Hz, 1H), 7.87 (s, 1H), 7.69 (s, 2H), 7.64 (d, *J* = 8.1 Hz, 1H), 7.21 (d, *J* = 8.0 Hz, 1H), 6.44 (d, *J* = 15.8 Hz, 1H), 5.80 (s, 2H), 3.86 (s, 3H); <sup>13</sup>C NMR (101 MHz, CDCl<sub>3</sub>) δ 166.2, 138.8, 138.7, 135.2, 135.0, 133.1, 130.8, 130.3, 123.7, 117.8, 113.3, 55.3, 52.1. IR: max (thin film) (cm<sup>-1</sup>)= 2355, 2330, 1699, 1683, 1653, 1558, 1506, 1456, 1123, 962, 667; HRMS (ESI-TOF) *m/z*: calcd for C<sub>14</sub>H<sub>12</sub>N<sub>4</sub>O<sub>2</sub>: 268.0960 found: 268.0961

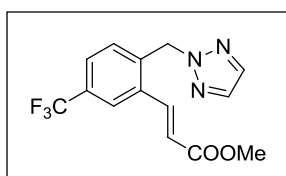

**(E)-methyl 3-(2-((2H-1,2,3-triazol-2-yl)methyl)-5-(trifluoromethyl)phenyl)acrylate (3l)**

White solid; m.p. 109 °C; <sup>1</sup>H NMR (400 MHz, CDCl<sub>3</sub>) δ 8.14 (d, *J* = 15.8 Hz, 1H), 7.86 (s, 1H), 7.70 (s, 2H), 7.64 (d, *J* = 8.0 Hz, 1H), 7.31 (s, 1H), 6.49 (d, *J* = 15.8 Hz, 1H), 5.83 (s, 2H), 3.88 (s, 3H); <sup>13</sup>C NMR (101 MHz, CDCl<sub>3</sub>) δ 166.39, 139.60, 137.57, 134.99, 134.52, 131.52, 131.20, 130.24, 126.69, 124.13, 122.95, 55.34, 52.03. IR: max (thin film) (cm<sup>-1</sup>)= 3080, 2978, 2360, 2346, 1680, 1663, 1654, 1620, 1558, 1523, 1433, 1120, 962, 663; HRMS (ESI-TOF) *m/z*: calcd for C<sub>14</sub>H<sub>12</sub>F<sub>3</sub>N<sub>3</sub>O<sub>2</sub>: 311.0882 found: 311.0881

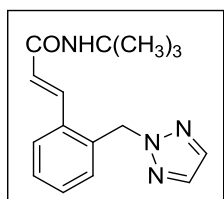

**(E)-3-(2-((2H-1,2,3-triazol-2-yl)methyl)phenyl)-N-(tert-butyl)acrylamide (3m)**

Yellow solid; m.p. 141 °C; <sup>1</sup>H NMR (400 MHz, CDCl<sub>3</sub>) δ 7.95 (d, *J* = 15.4 Hz, 1H), 7.64 (s, 2H), 7.53 (dd, *J* = 5.2, 3.9 Hz, 1H), 7.35 – 7.30 (m, 2H), 7.16 – 7.08 (m, 1H), 6.27 (d, *J* = 15.4 Hz, 1H), 5.76 (s, 2H), 1.44 (d, *J* = 13.6 Hz, 9H); <sup>13</sup>C NMR (101 MHz, CDCl<sub>3</sub>) δ 164.9, 136.3, 134.6, 134.5, 133.8, 129.6, 129.5, 128.8, 127.0, 125.8, 56.0, 51.6, 28.9. IR: max (thin film) (cm<sup>-1</sup>) = 3288, 2927, 2924, 1659, 1620, 1547, 1452, 1342, 1223, 1130, 962, 762, 727; HRMS (ESI-TOF) *m/z*: calcd for C<sub>16</sub>H<sub>20</sub>N<sub>4</sub>O: 284.1637 found: 284.1639

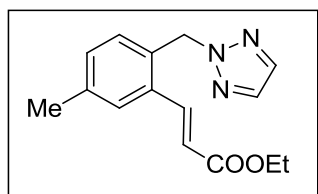

**(E)-ethyl 3-(2-((2H-1,2,3-triazol-2-yl)methyl)-5-methylphenyl)acrylate (3n)**

Yellow oil. <sup>1</sup>H NMR (400 MHz, CDCl<sub>3</sub>) δ 8.10 (d, *J* = 15.8 Hz, 1H), 7.63 (s, 2H), 7.44 (s, 1H), 7.20 (d, *J* = 7.8 Hz, 1H), 7.14 (d, *J* = 7.8 Hz, 1H), 6.38 (d, *J* = 15.7 Hz, 1H), 5.73 (s, 2H), 4.29 (q, *J* = 7.1 Hz, 2H), 2.37 (s, 3H), 1.36 (t, *J* = 7.1 Hz, 3H). <sup>13</sup>C NMR (101 MHz, CDCl<sub>3</sub>) δ 166.6, 141.0, 138.9, 134.5, 133.6, 131.1, 131.1, 130.1, 127.7, 121.1, 60.6, 55.6, 21.2, 14.3. IR: max (thin film) (cm<sup>-1</sup>) = 3065, 2979, 2792, 2388, 1749, 1686, 1626, 1540, 1425, 1176, 1053, 962, 853, 772, 630; HRMS (ESI-TOF) *m/z*: calcd for C<sub>15</sub>H<sub>17</sub>N<sub>3</sub>O<sub>2</sub>: 271.1321 found: 271.1321

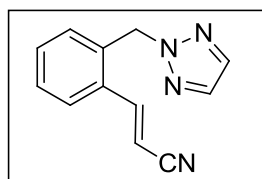

**(E)-3-(2-((2H-1,2,3-triazol-2-yl)methyl)phenyl)acrylonitrile (3o)**

Yellow solid; m.p. 110 °C; <sup>1</sup>H NMR (400 MHz, CDCl<sub>3</sub>) δ 7.96 (d, *J* = 16.4 Hz, 1H), 7.64 (d, *J* = 6.8 Hz, 2H), 7.54 (d, *J* = 7.5 Hz, 1H), 7.48 – 7.36 (m, 3H), 5.86 (d, *J* = 16.4 Hz, 1H), 5.70 (s, 2H); <sup>13</sup>C NMR (126 MHz, CDCl<sub>3</sub>) δ 147.4, 134.8, 133.6, 133.3, 131.2, 130.8, 129.4, 126.5, 117.7, 99.5, 55.8. IR: max (thin film) (cm<sup>-1</sup>) = 3130, 2916, 2846, 2220, 1618, 1485, 1421, 1419, 1346, 1130, 962, 845, 752; HRMS (ESI-TOF) *m/z*: calcd for C<sub>12</sub>H<sub>10</sub>N<sub>4</sub>: 210.0905 found: 210.0905

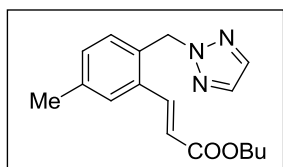

**(E)-butyl 3-(2-((2H-1,2,3-triazol-2-yl)methyl)-5-methylphenyl)acrylate (3p)**

Colorless oil. <sup>1</sup>H NMR (400 MHz, CDCl<sub>3</sub>) δ 8.11 (d, *J* = 15.8 Hz, 1H), 7.63 (s, 2H), 7.44 (s, 1H), 7.20 (d, *J* = 7.8 Hz, 1H), 7.14 (d, *J* = 7.8 Hz, 1H), 6.38 (d, *J* = 15.8 Hz, 1H), 5.72 (s, 2H), 4.23 (t, *J* = 6.6 Hz, 2H), 2.37 (s, 3H), 1.76 – 1.64 (m, 2H), 1.47 (m, 2H), 0.99 (t, *J* = 7.4 Hz, 3H); <sup>13</sup>C NMR (101 MHz, CDCl<sub>3</sub>) δ 166.6, 140.8, 134.6, 134.1, 133.8, 130.3, 130.0, 129.0, 127.1, 121.5, 64.6, 55.9, 30.8, 21.2,

19.1, 13.8; IR: max (thin film) (cm<sup>-1</sup>)= 3056, 2983, 2779, 2384, 1750, 1689, 1628, 1543, 1424, 1178, 1052, 962, 853, 772, 630; HRMS (ESI-TOF) m/z: calcd for C<sub>17</sub>H<sub>21</sub>N<sub>3</sub>O<sub>2</sub>: 299.1634 found: 299.1635

Reference:

1. J. Doiron, A. H. Sultana, R. Richard, M. M. Toure, N. Picot, R. Richard, M. C. Culf, G. A. Robichaud, M. Touaibia, *Eur. J. Med. Chem.*, 2011, **46**, 4010.
2. H. Wolfgang, B. Bettina, J. Christine, K. Michael, L. Thierry, B. Wayne, *Scientia Pharmaceutica*, 2004, **72**, 197.

## NMR Spectra of compounds

<sup>1</sup>H-3a

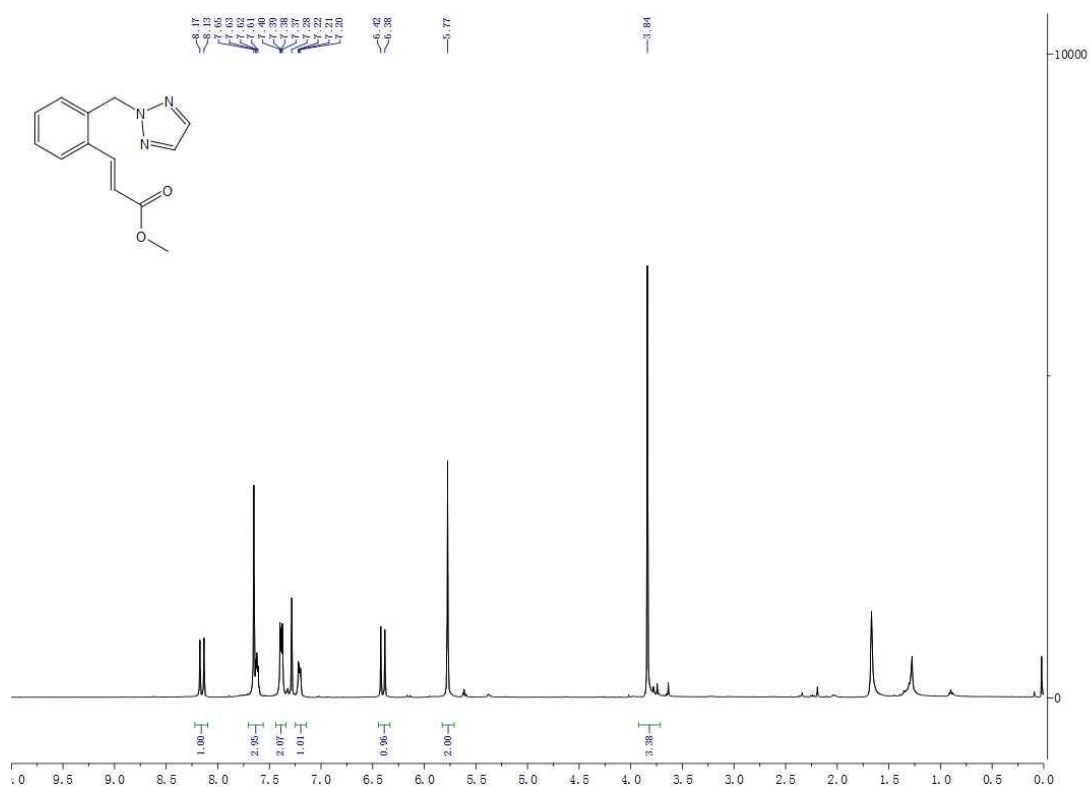

<sup>13</sup>C-3a

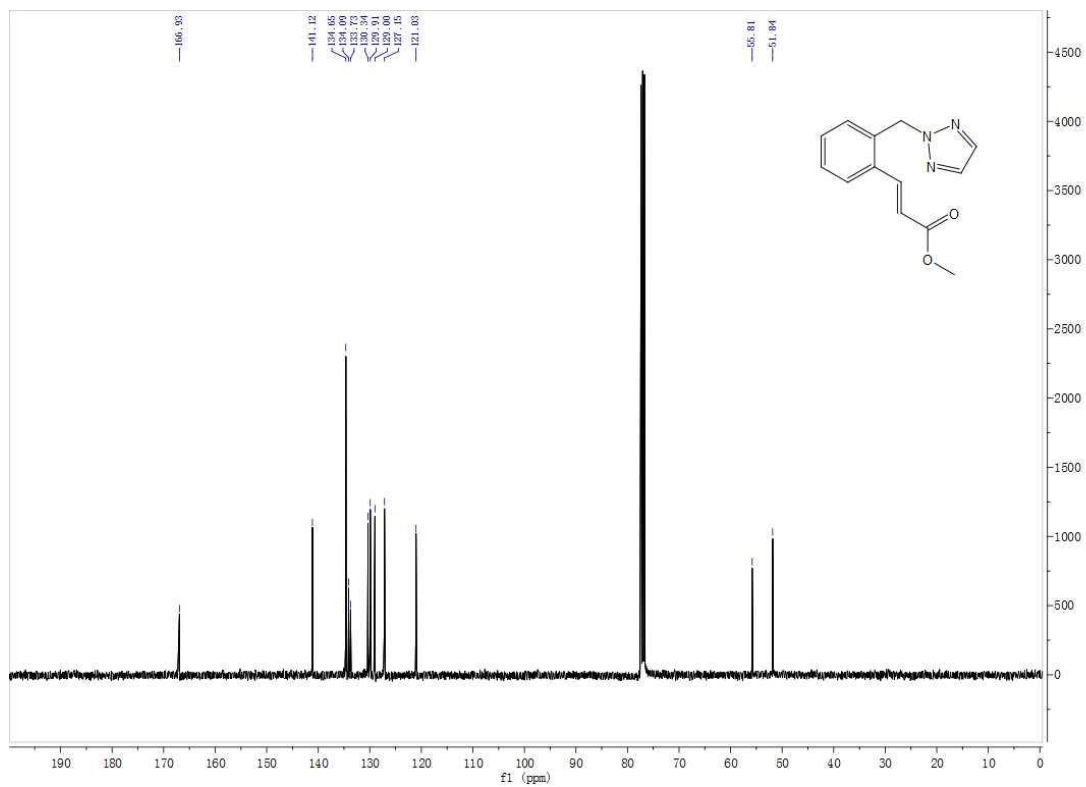

<sup>1</sup>H-3b

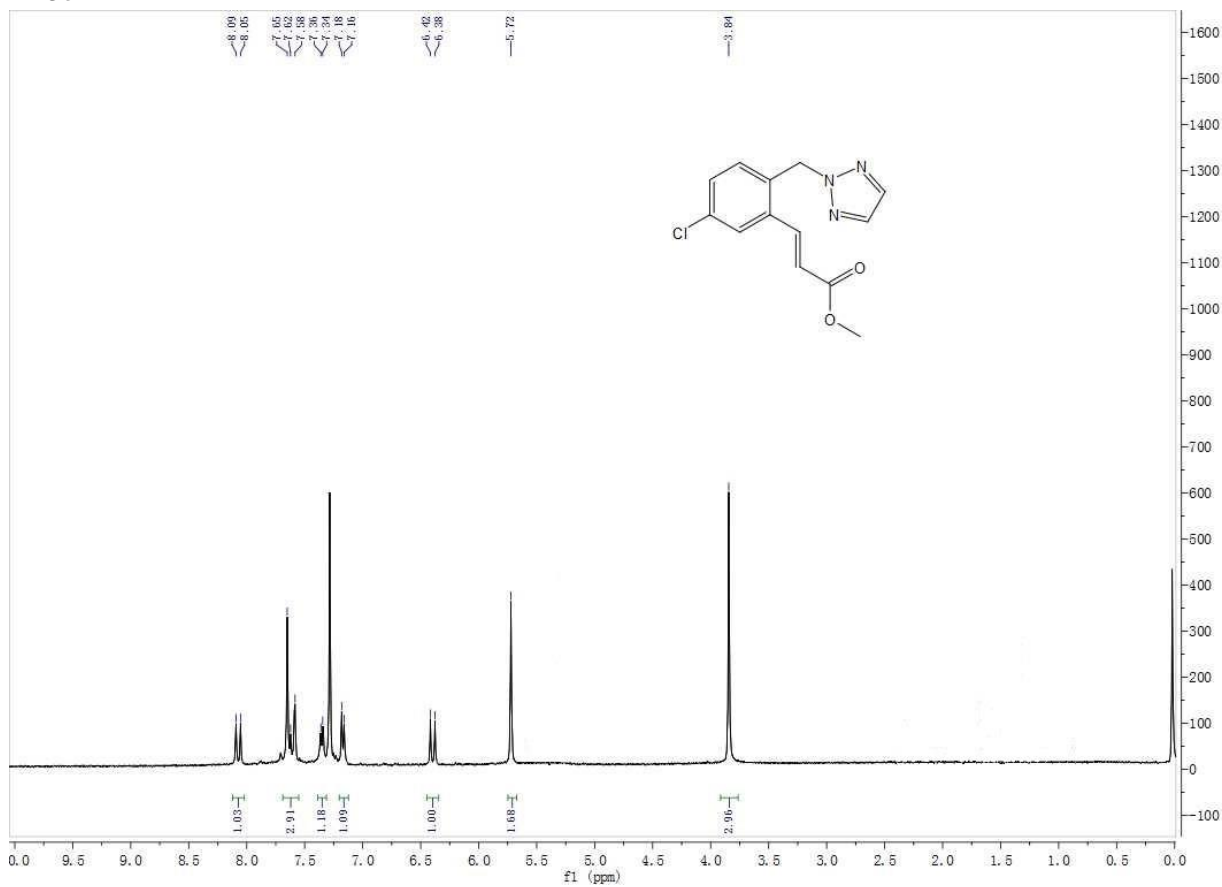

<sup>13</sup>C-3b



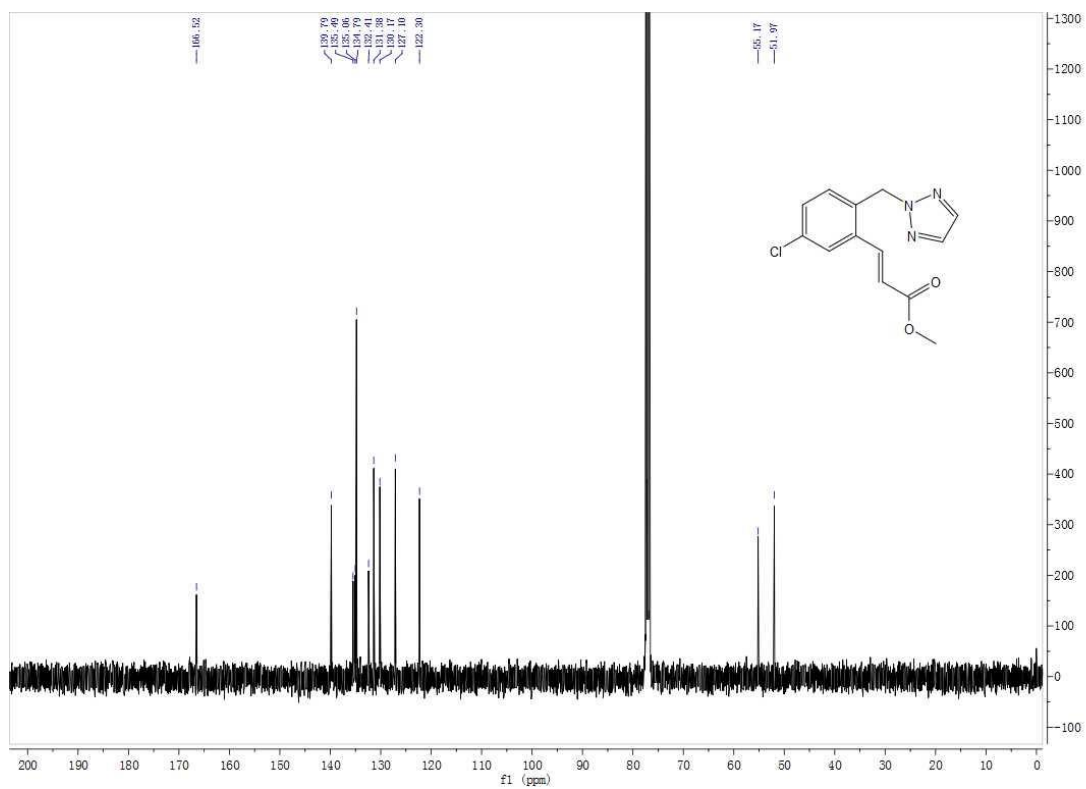

<sup>1</sup>H-3c

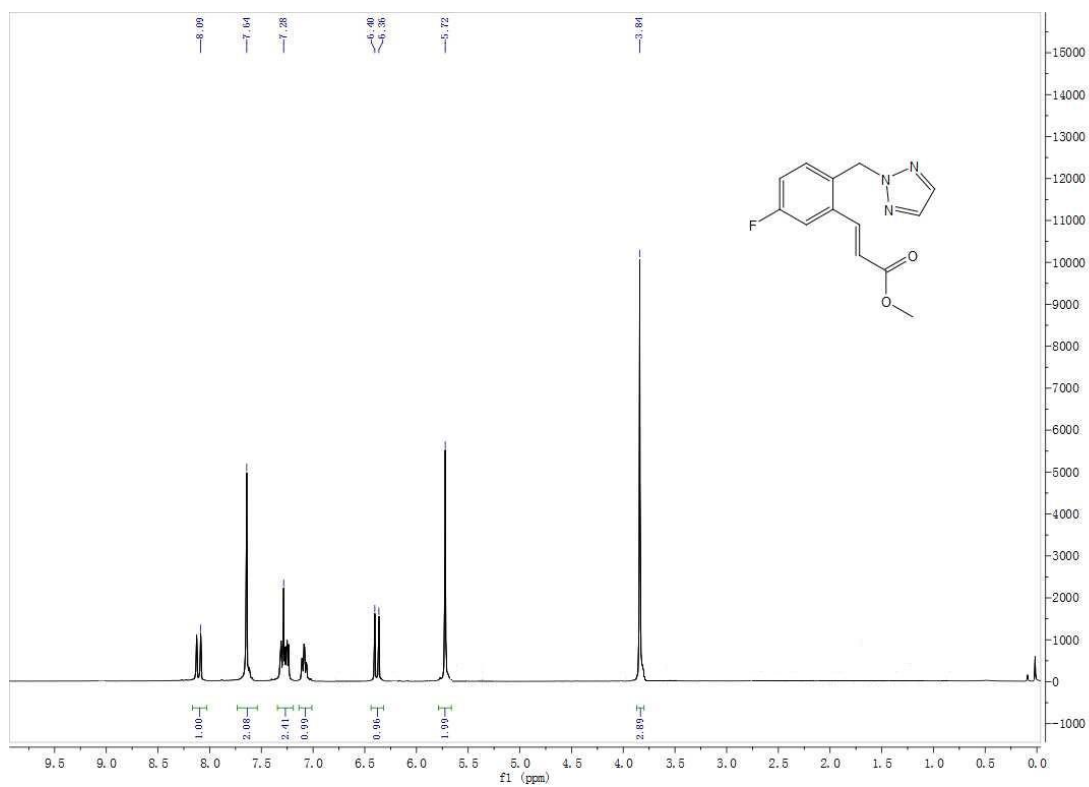

<sup>13</sup>C-3c

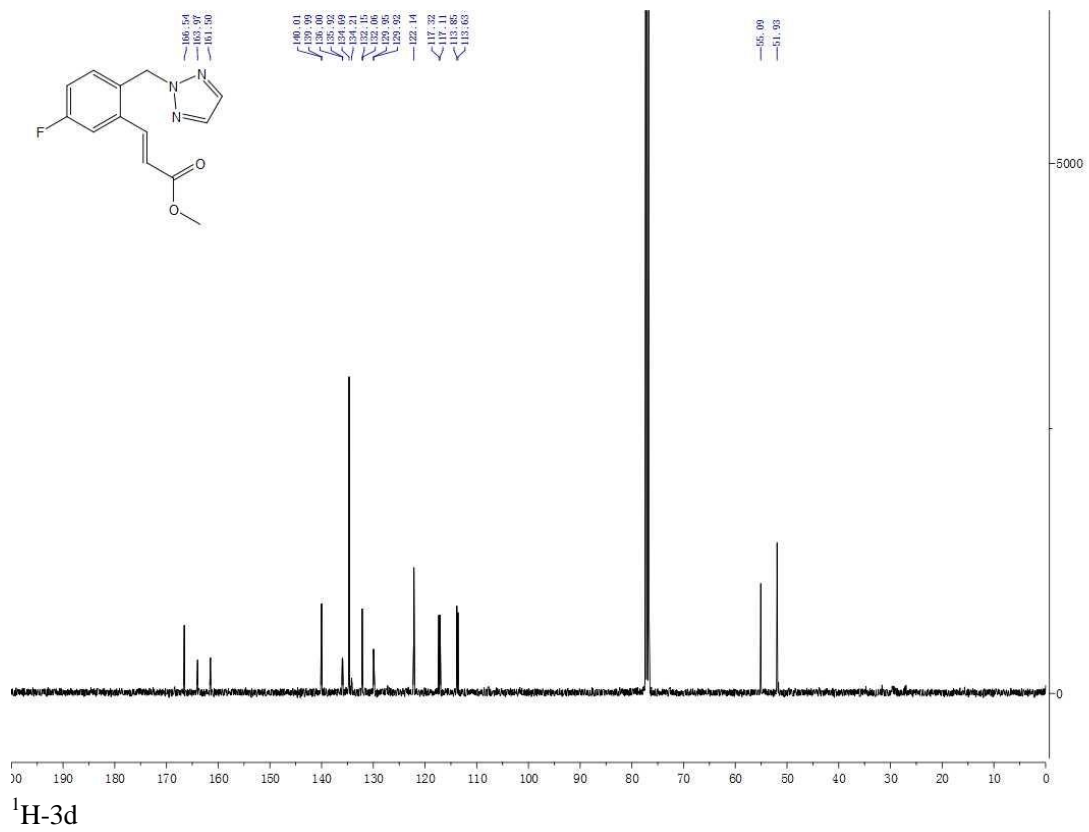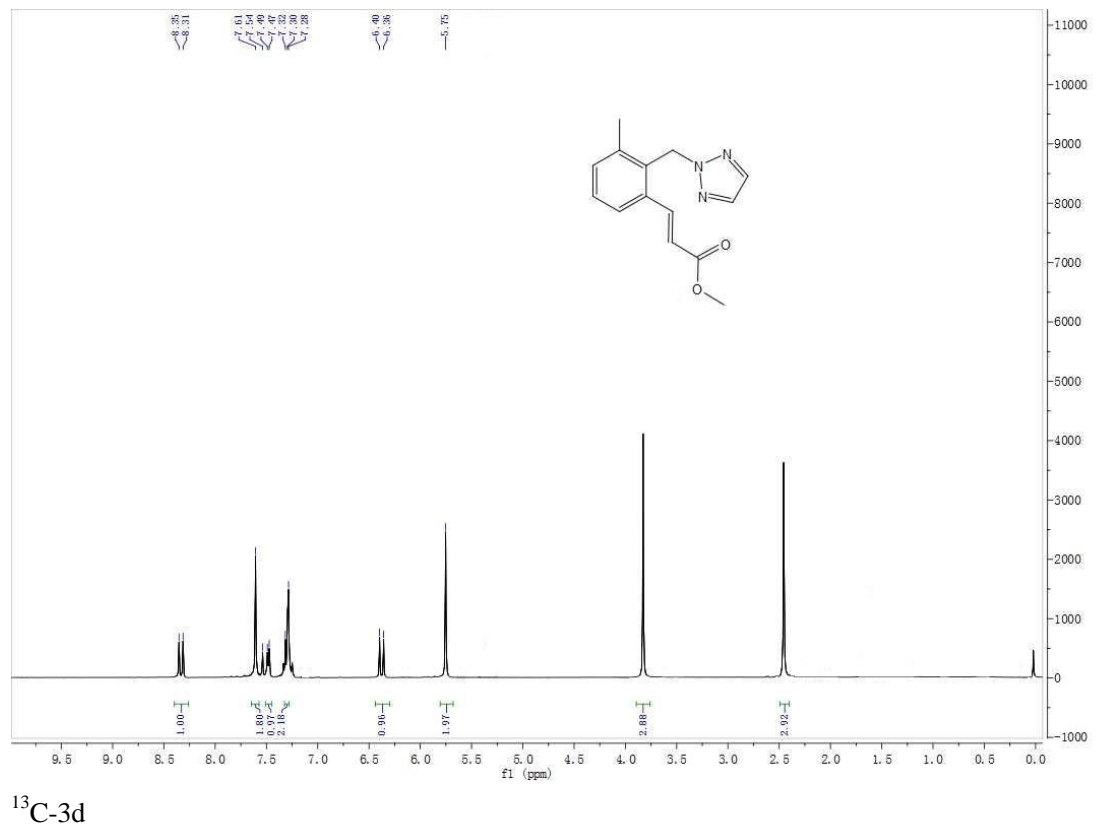

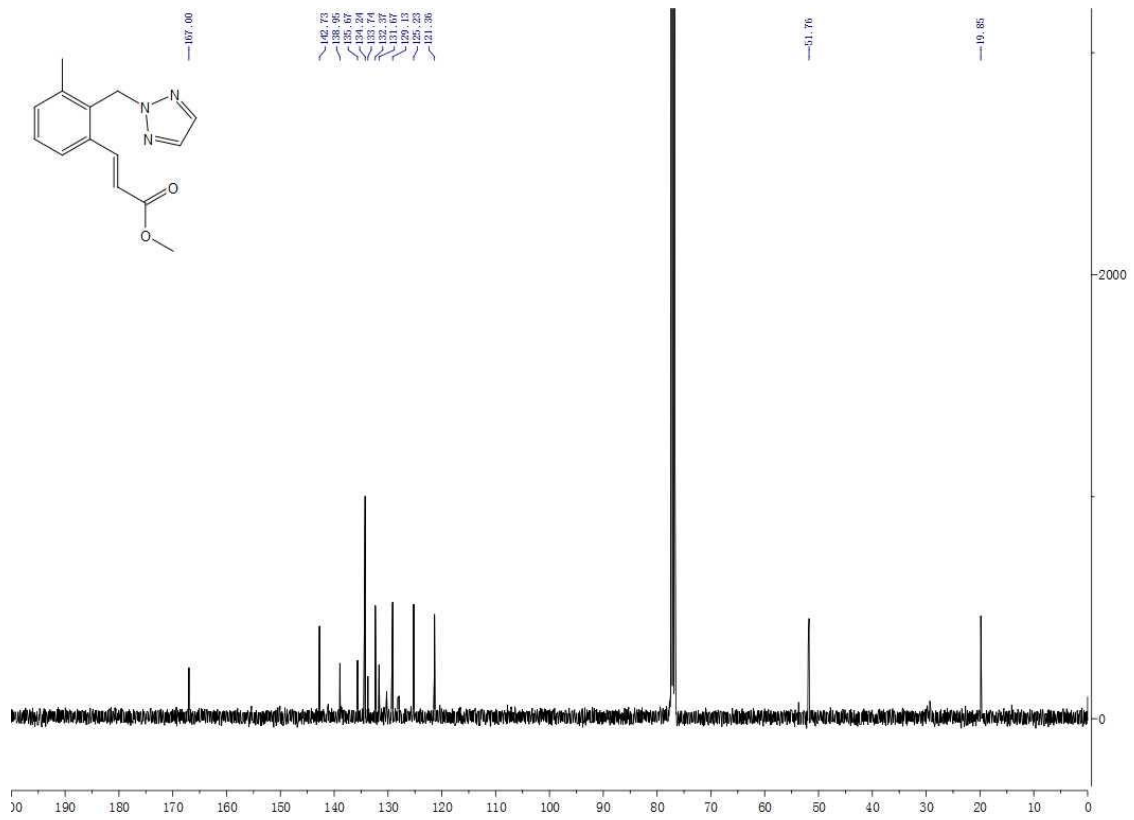

<sup>1</sup>H-3e

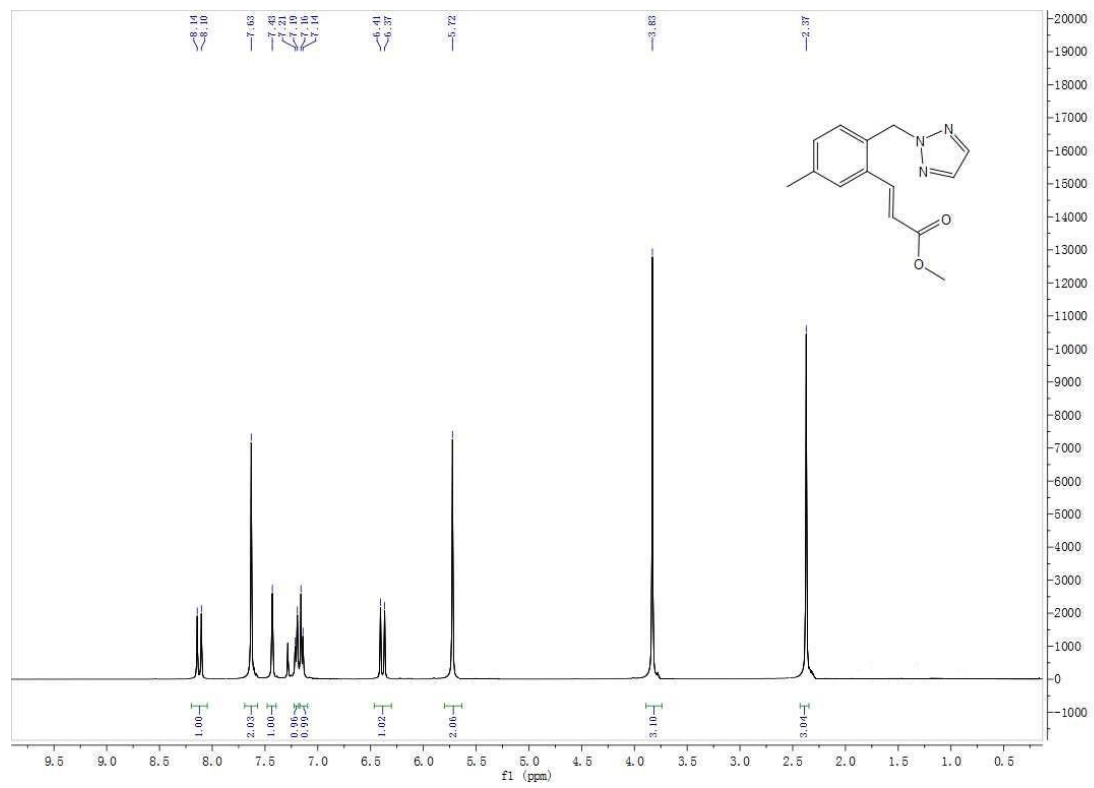

<sup>13</sup>C-3e

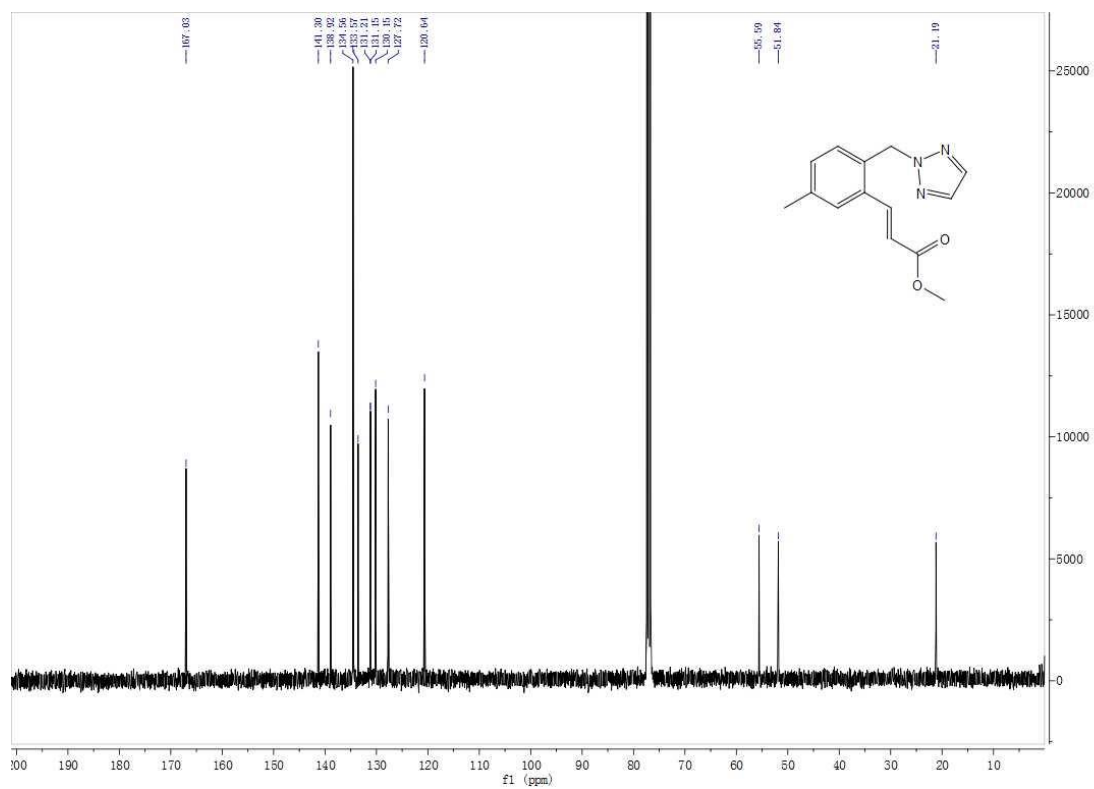

<sup>1</sup>H-3f

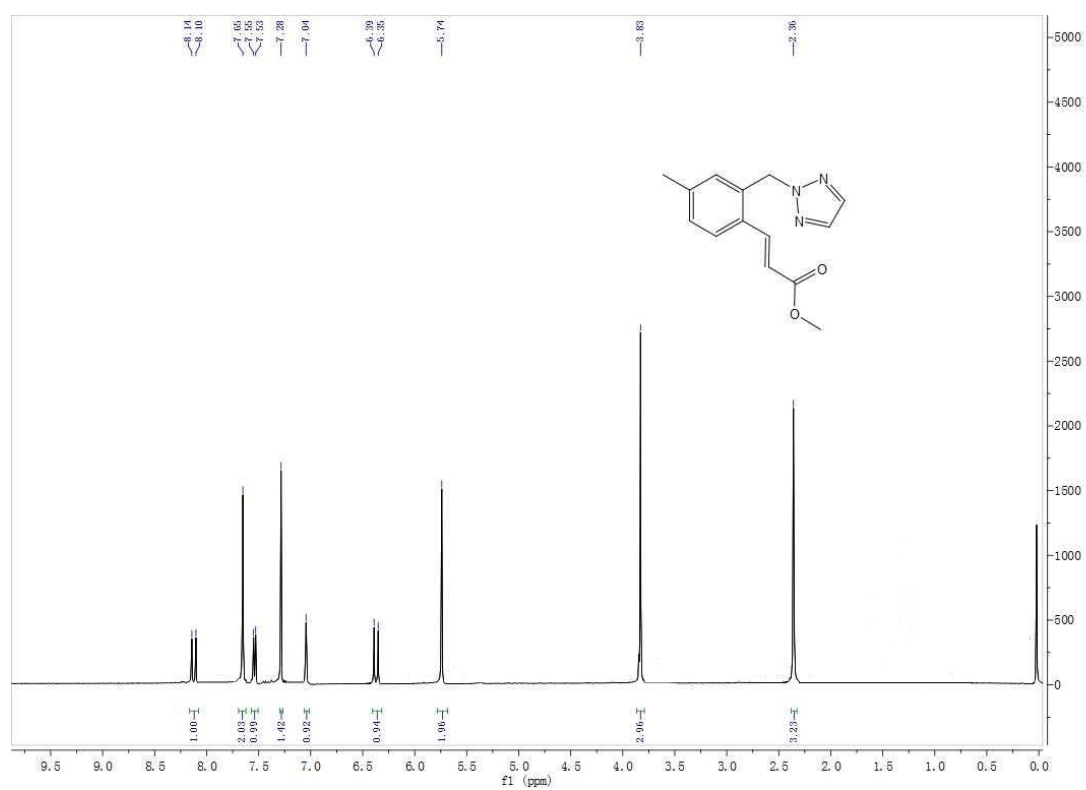

<sup>13</sup>C-3f

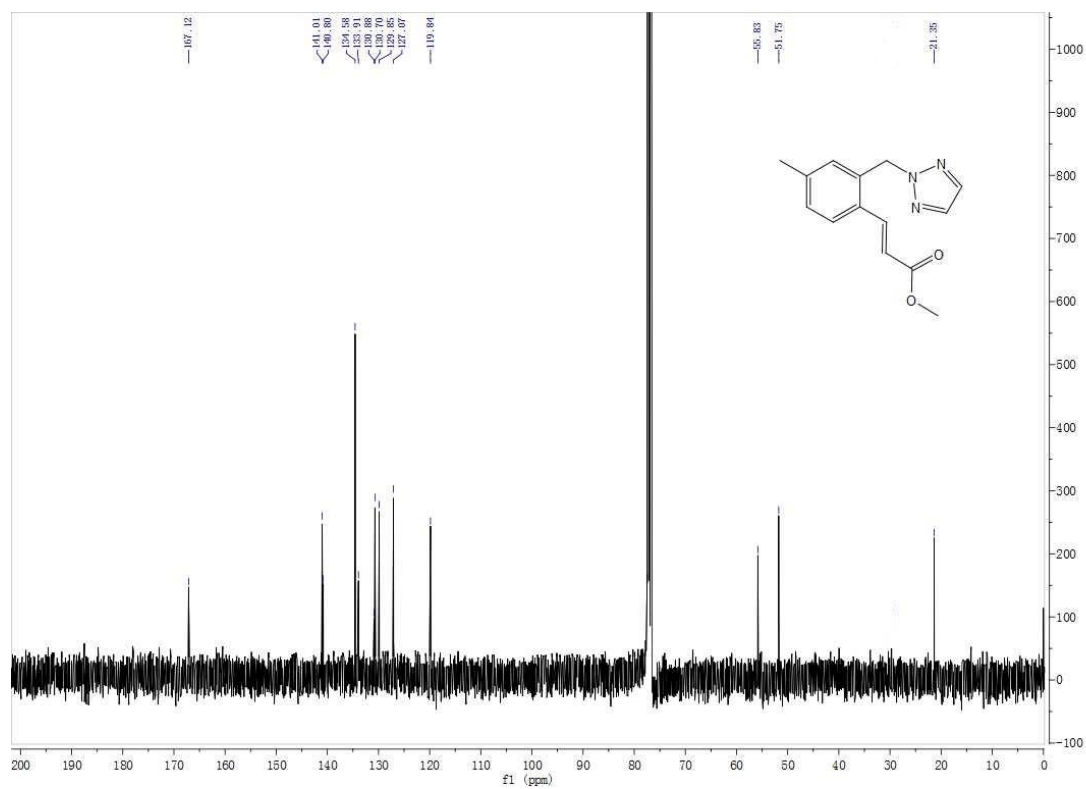

<sup>1</sup>H-3g

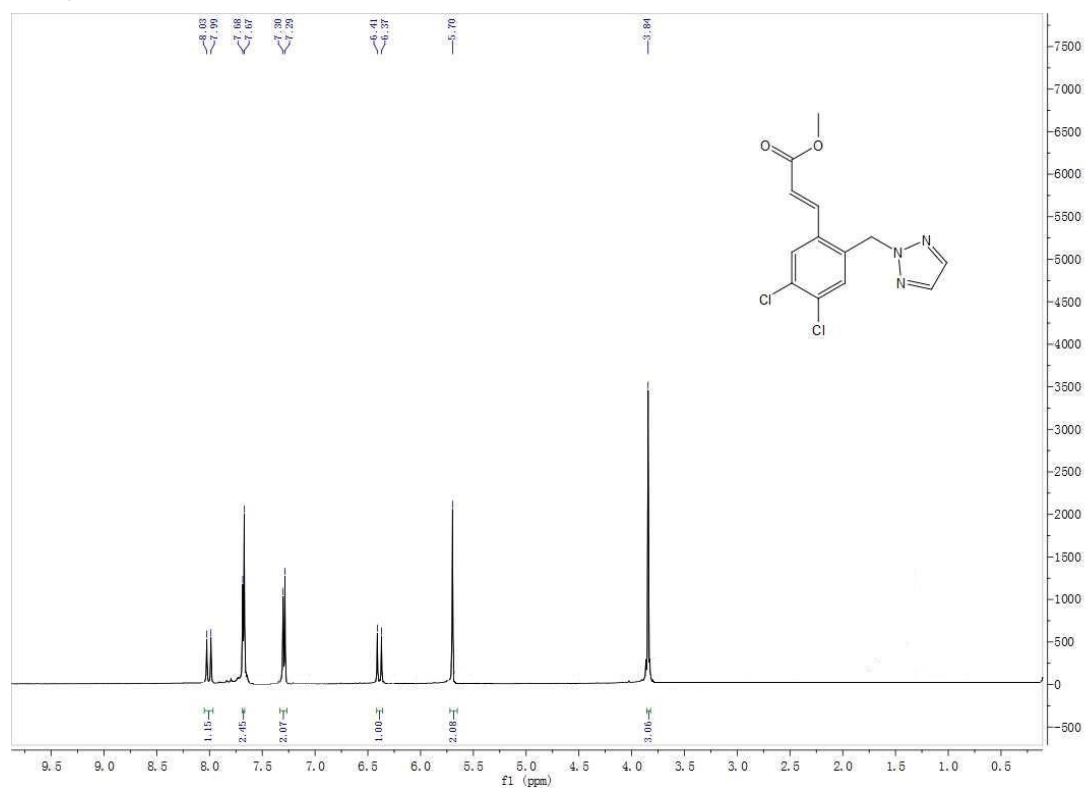

<sup>13</sup>C-3g

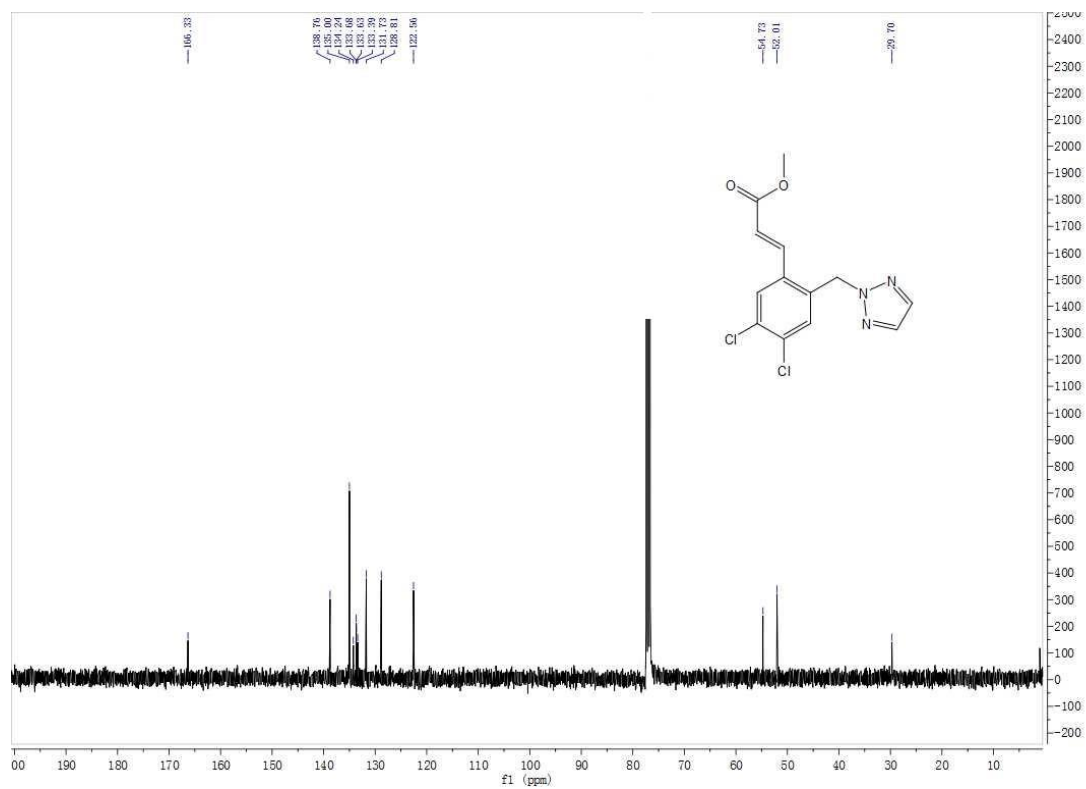

$^1\text{H}$ -3h

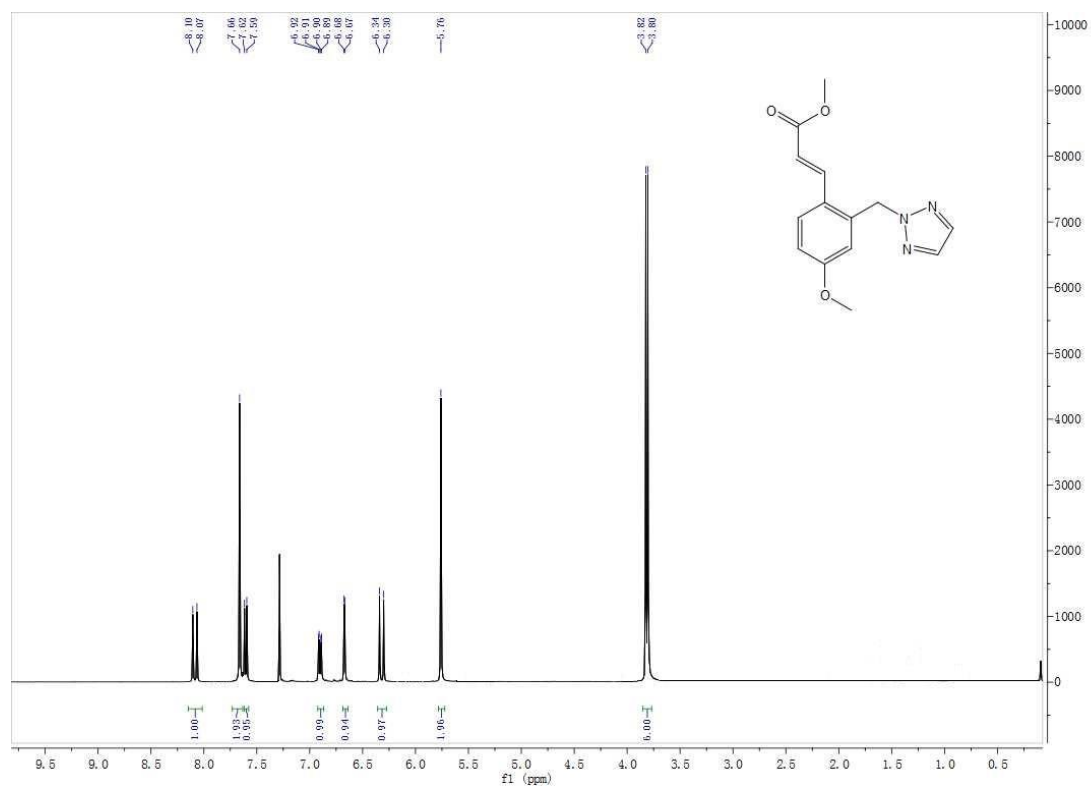

$^{13}\text{C}$ -3h

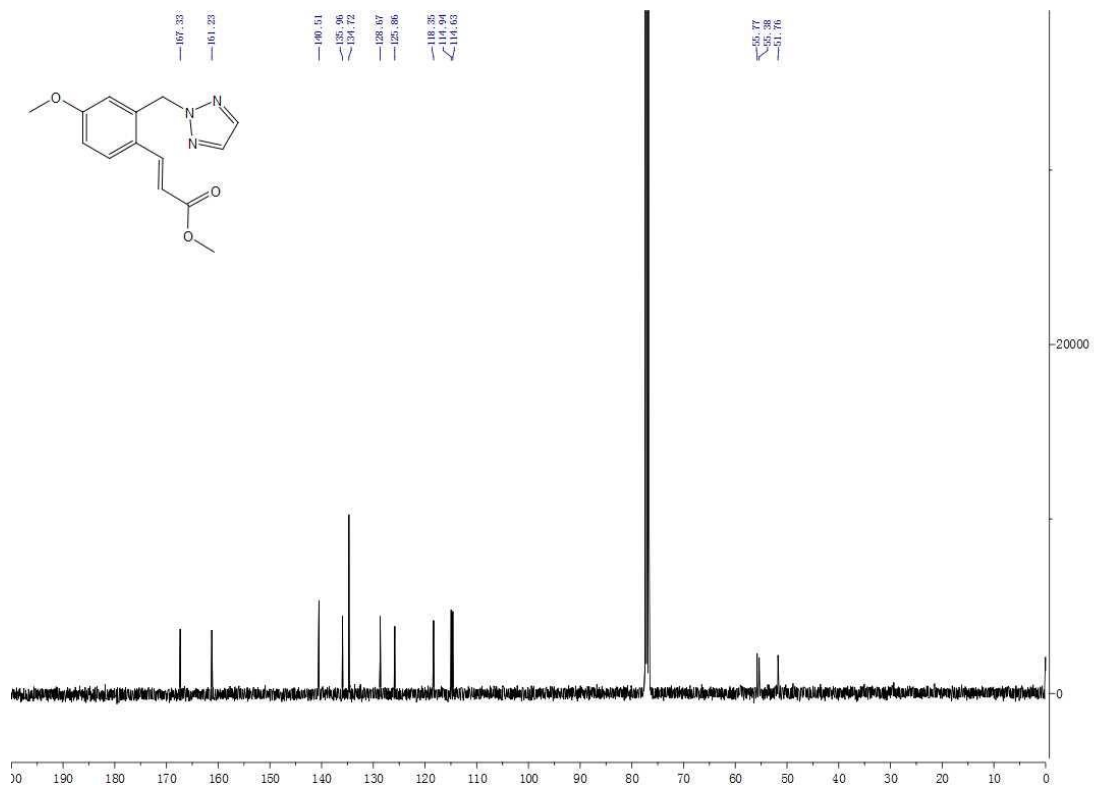

<sup>1</sup>H-3i

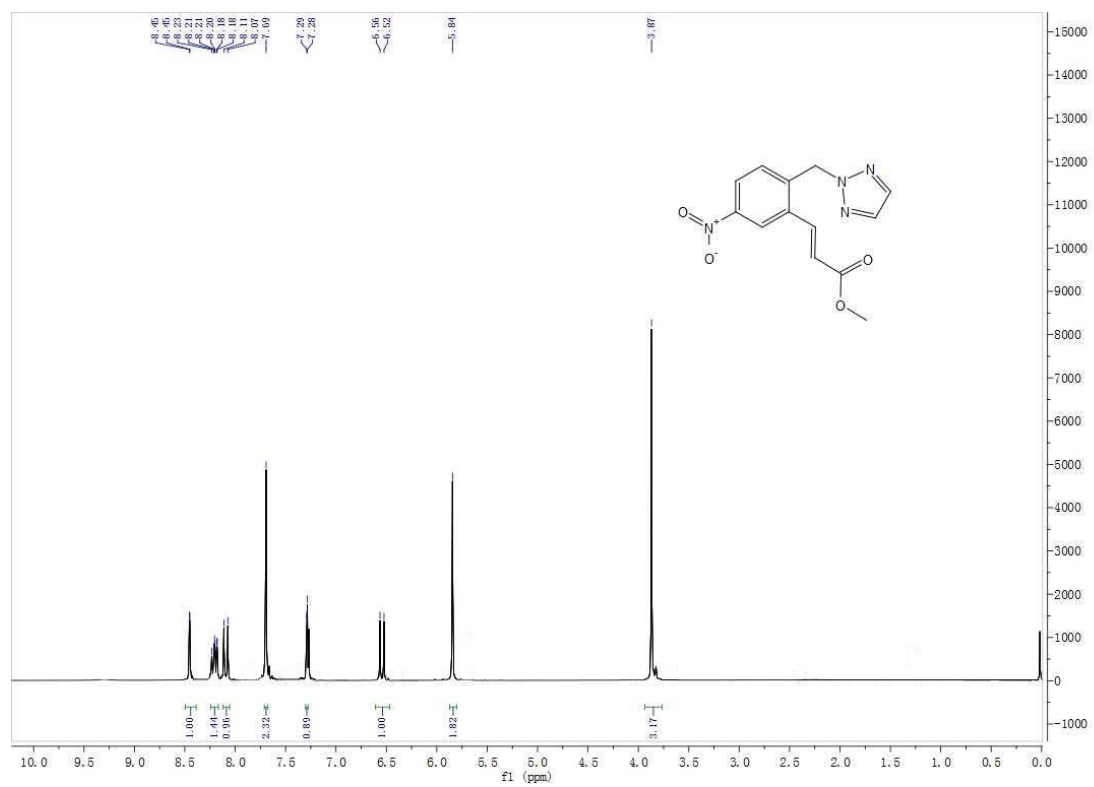

<sup>13</sup>C-3i

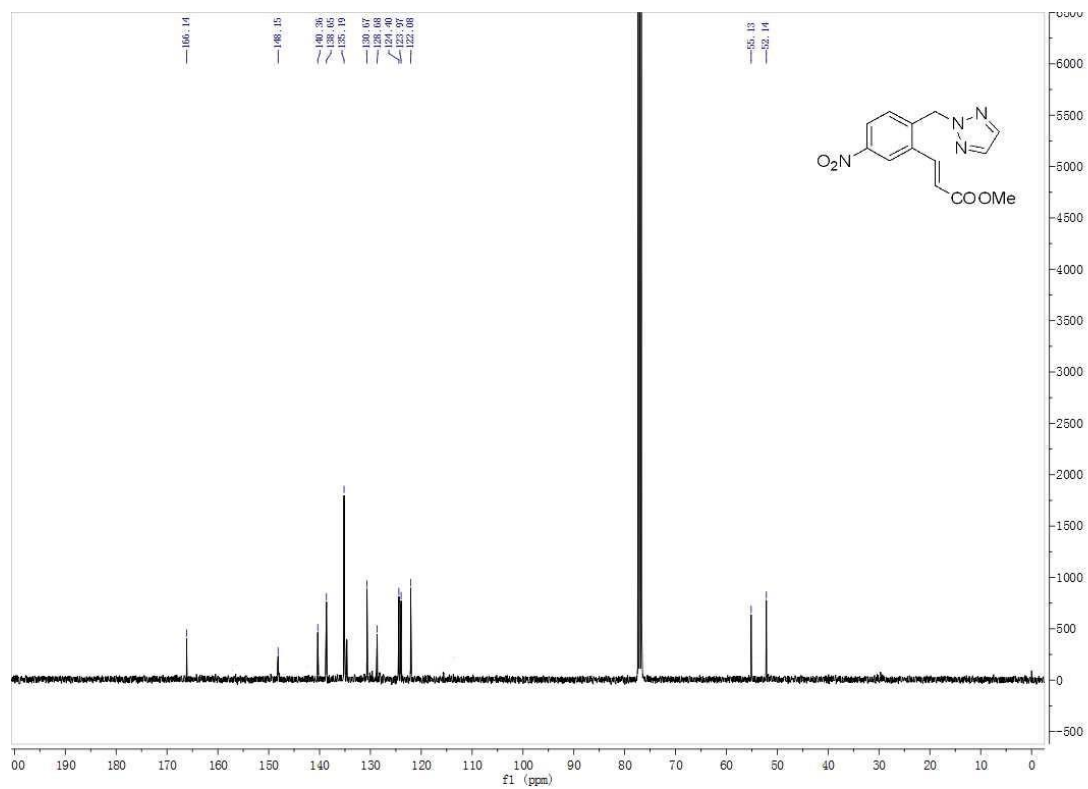

<sup>1</sup>H-3j

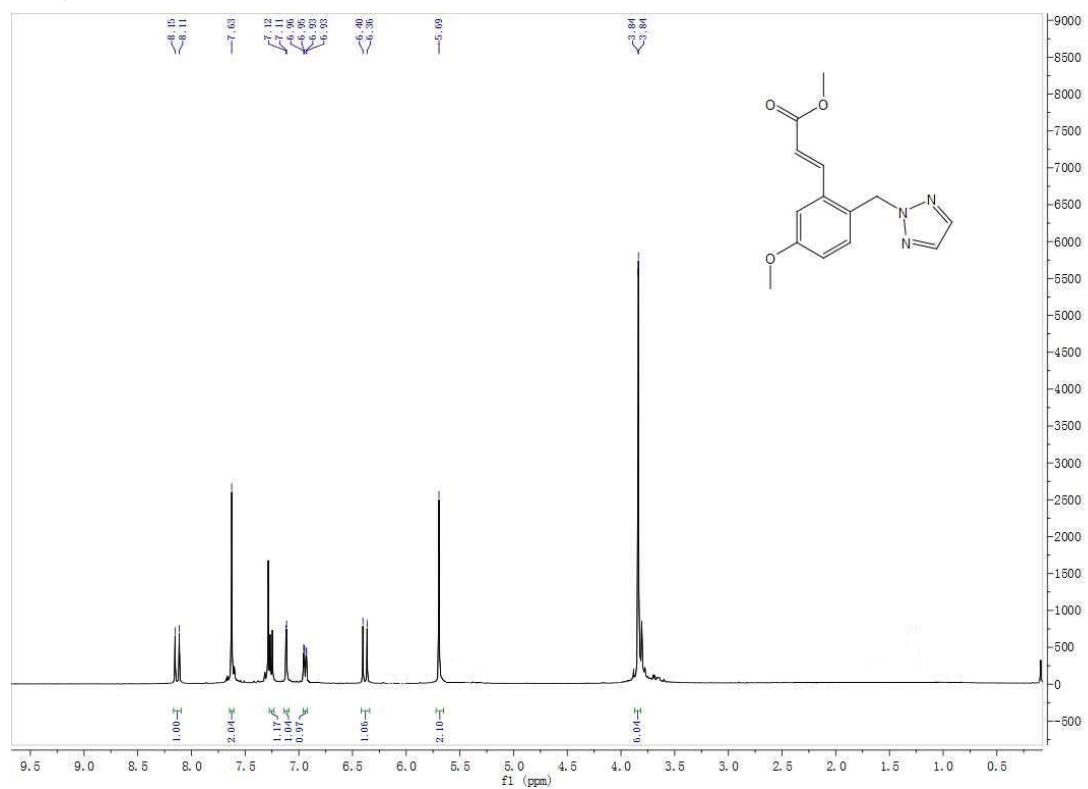

<sup>13</sup>C-3j



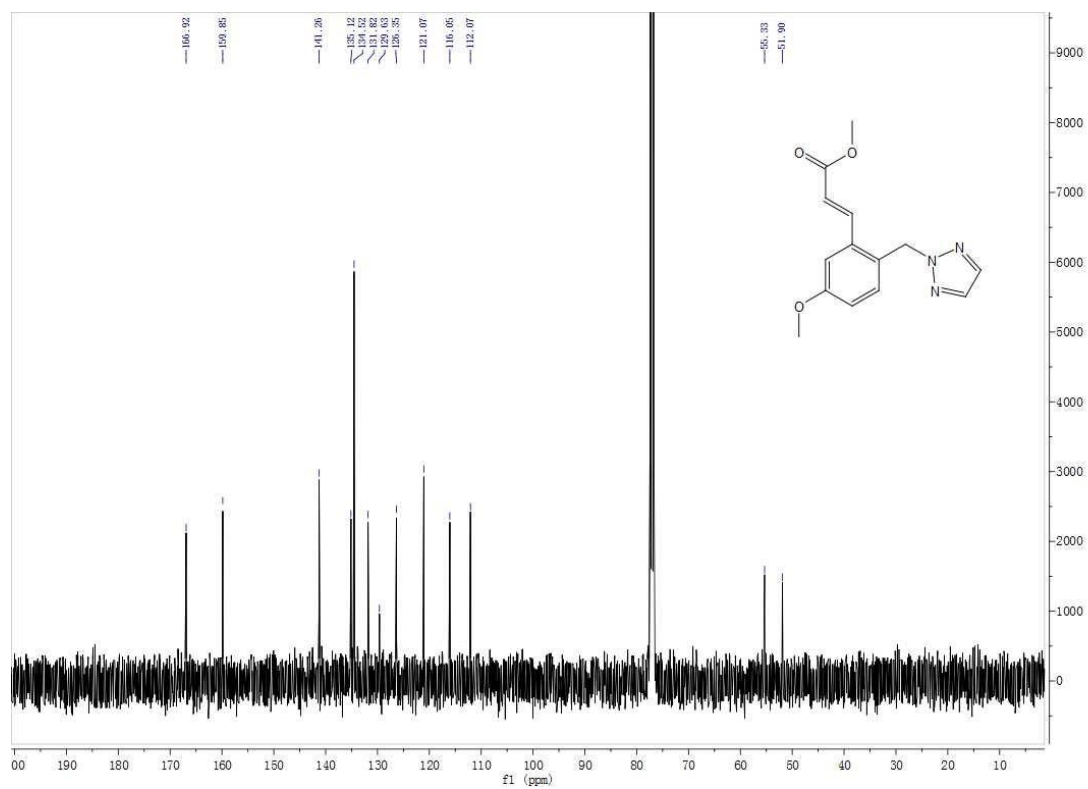

1H-3k

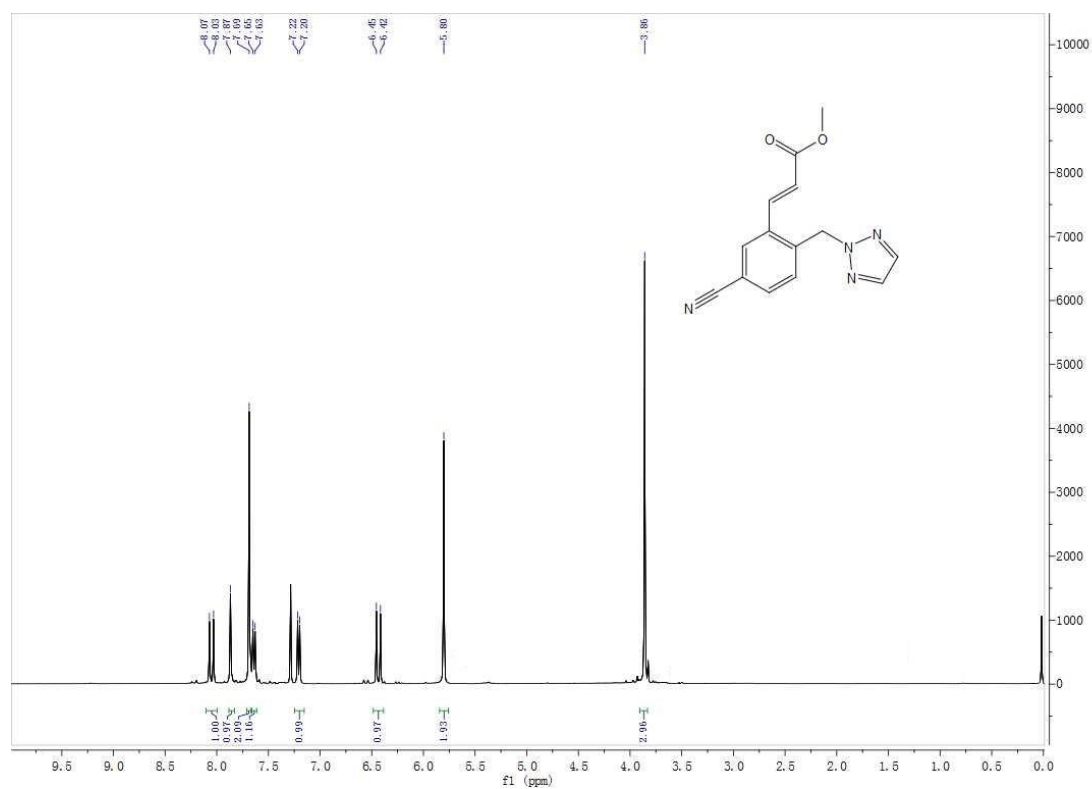

<sup>13</sup>C-3k

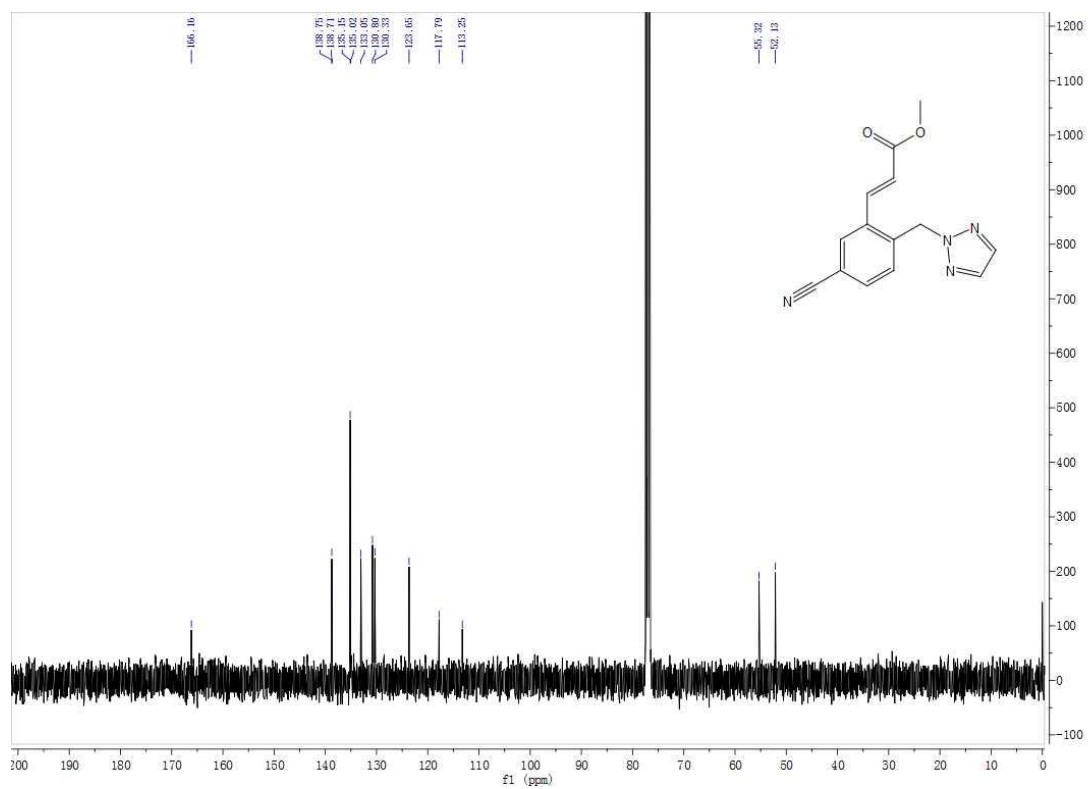

<sup>1</sup>H-31

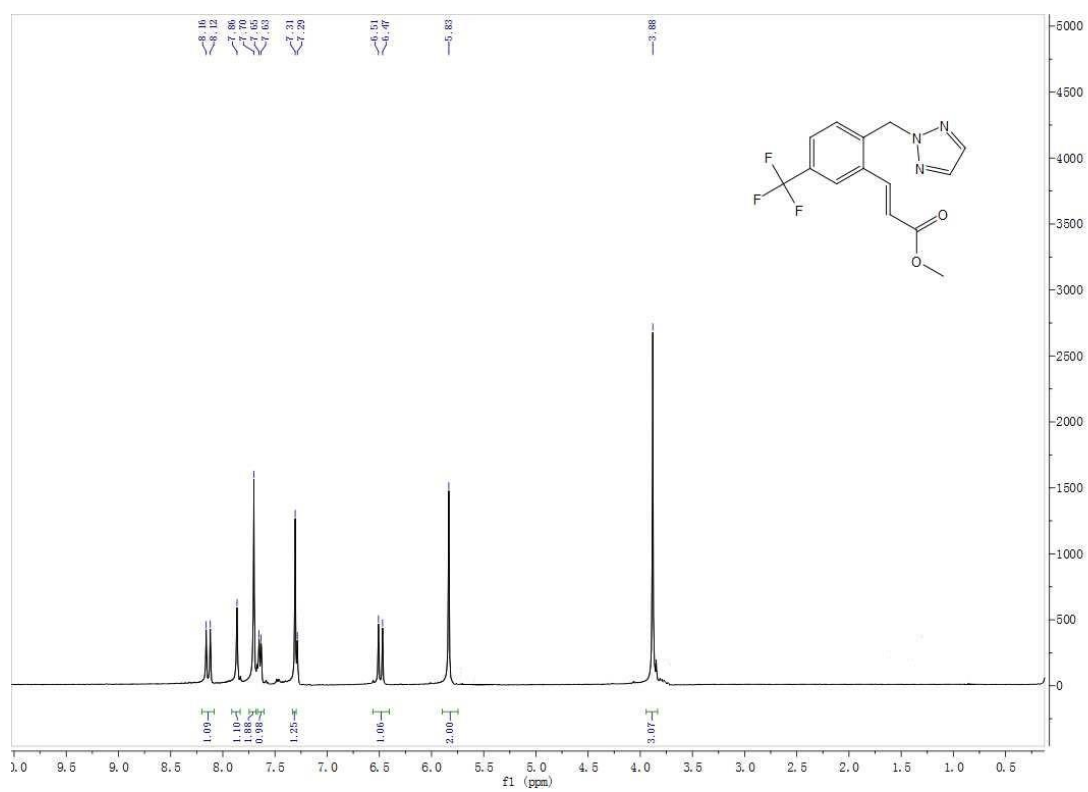

<sup>13</sup>C-31

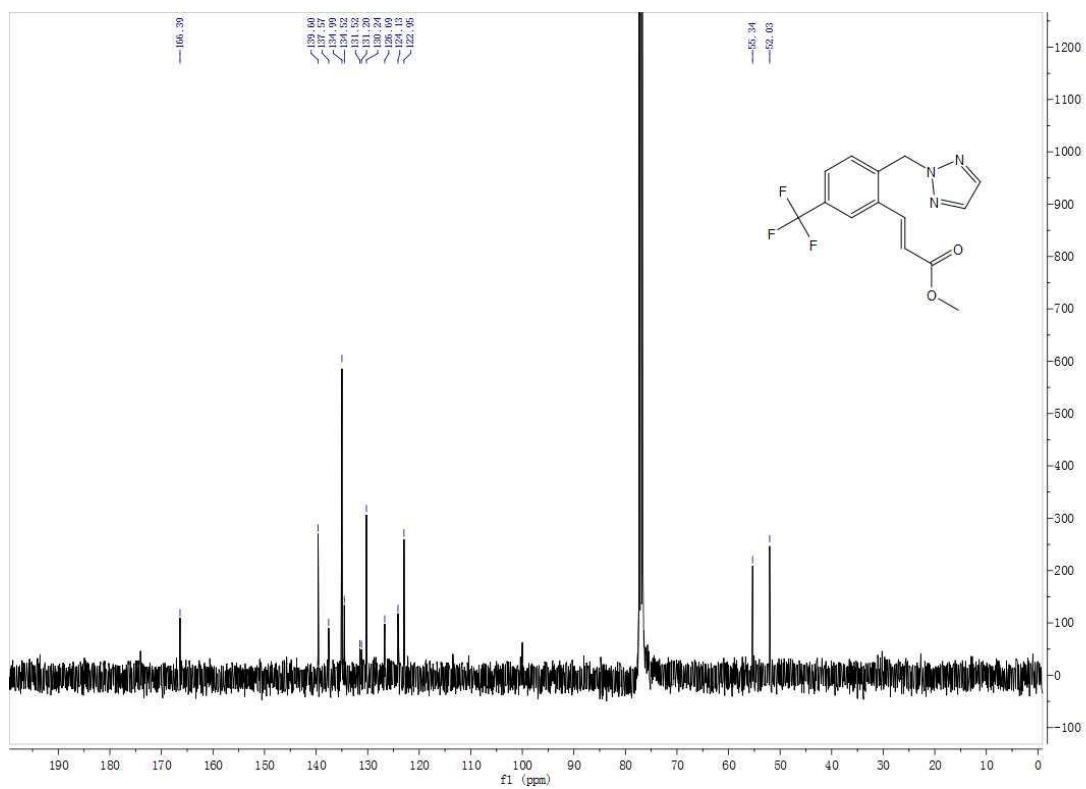

**<sup>1</sup>H-3m**

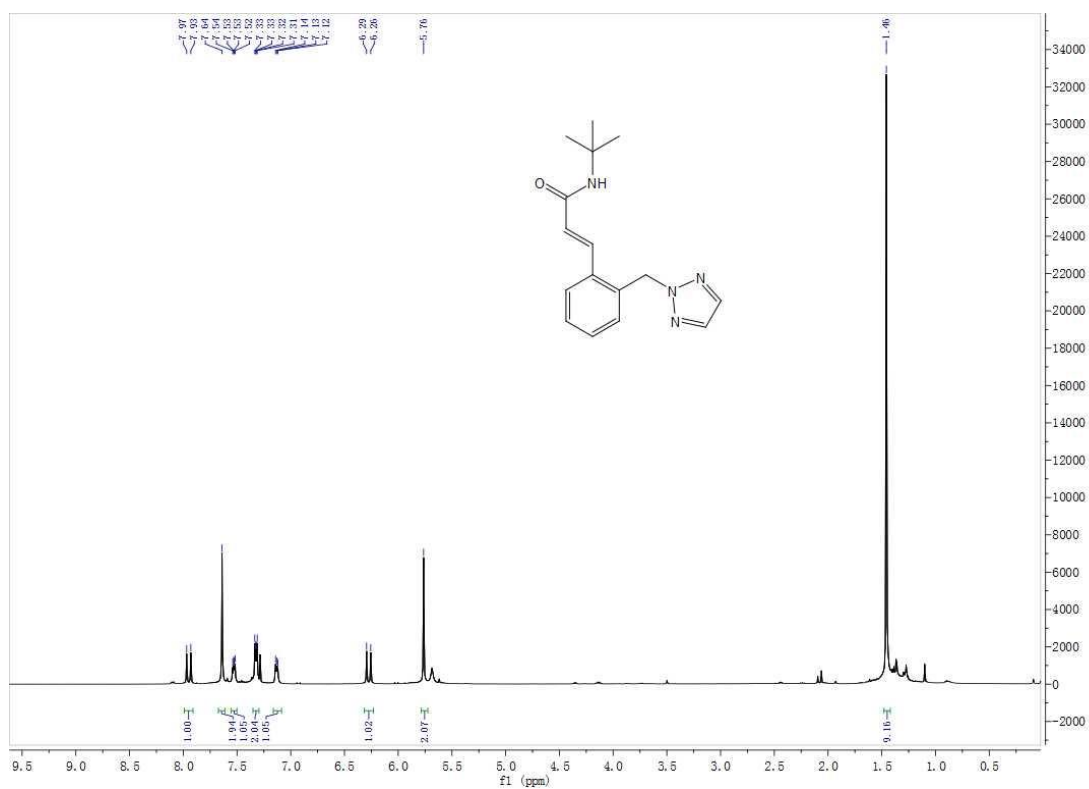

**<sup>13</sup>C-3m**

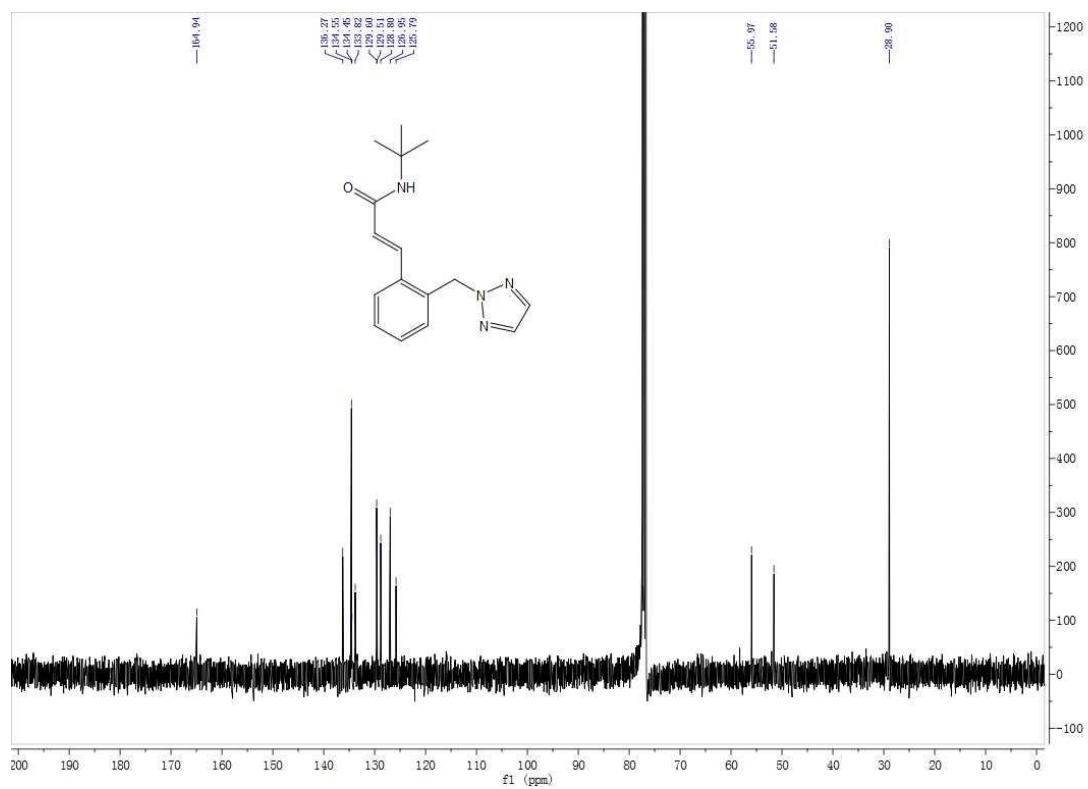

<sup>1</sup>H-3n

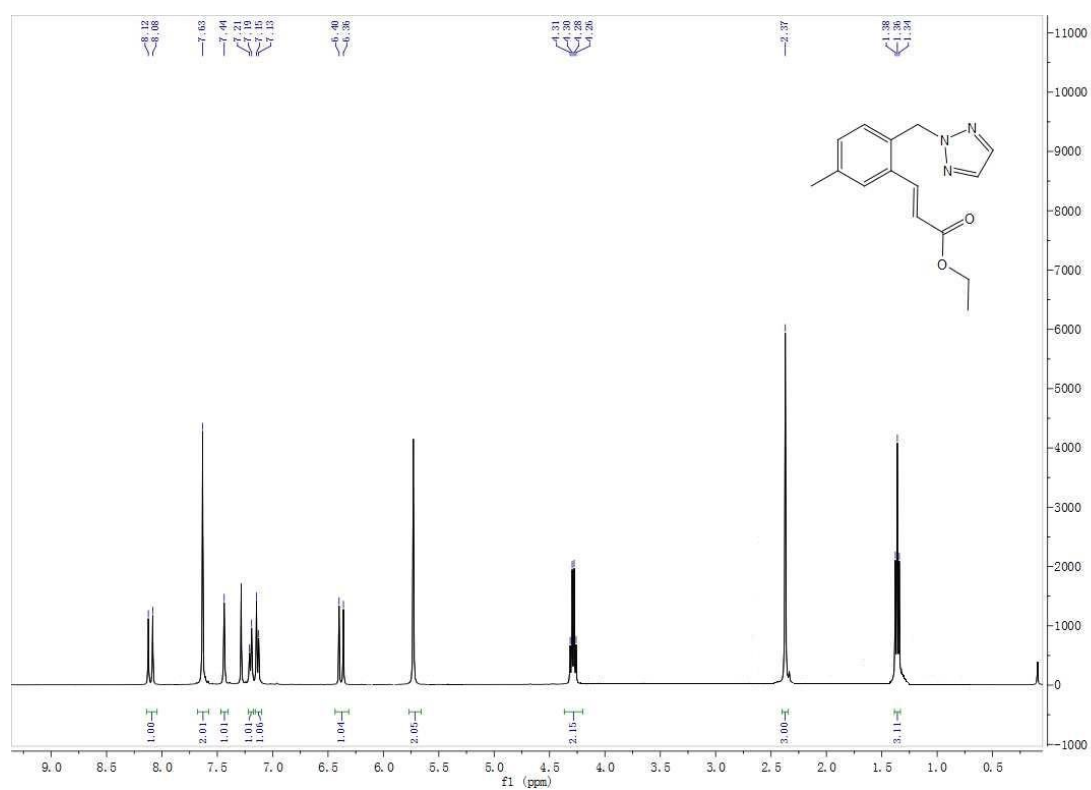

<sup>13</sup>C-3n

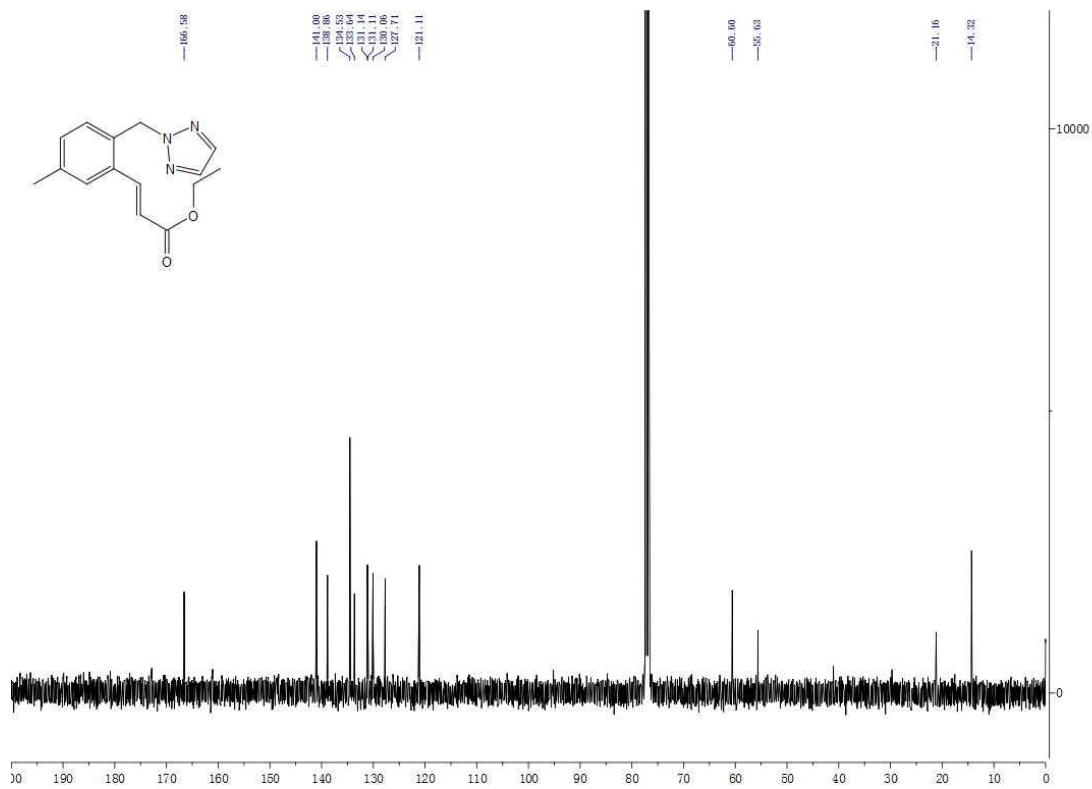

<sup>1</sup>H-3o

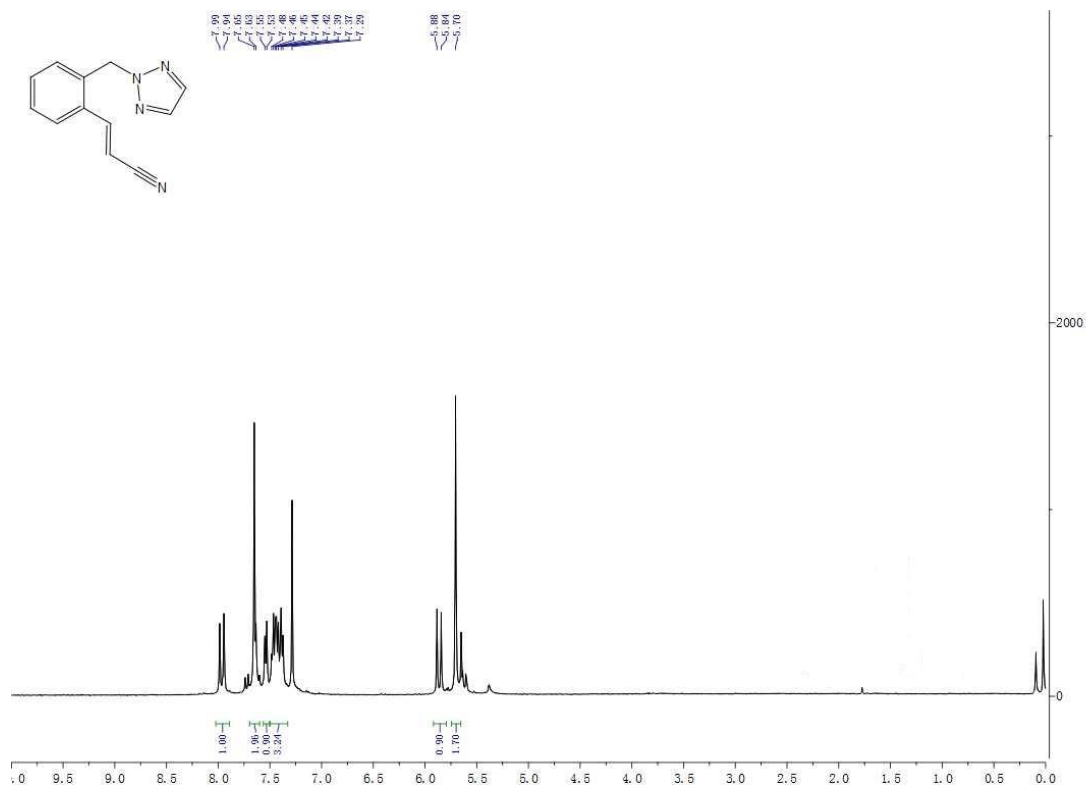

$^{13}\text{C}$ -3o

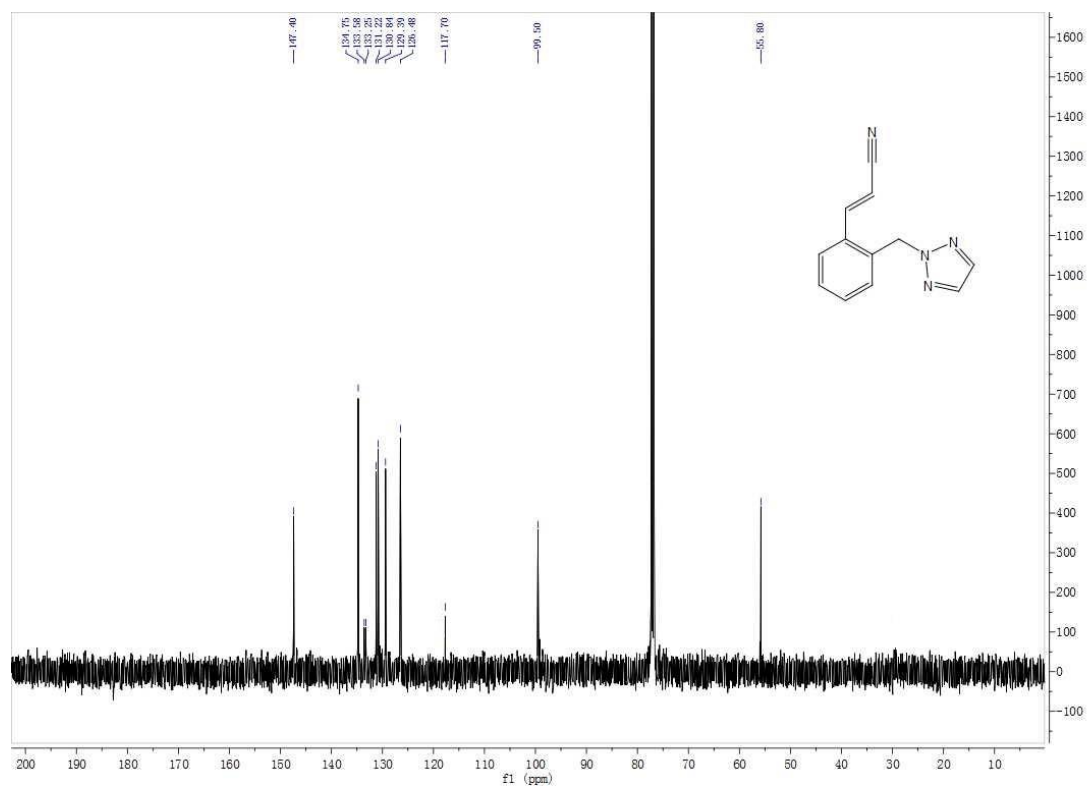

$^1\text{H}$ -3p

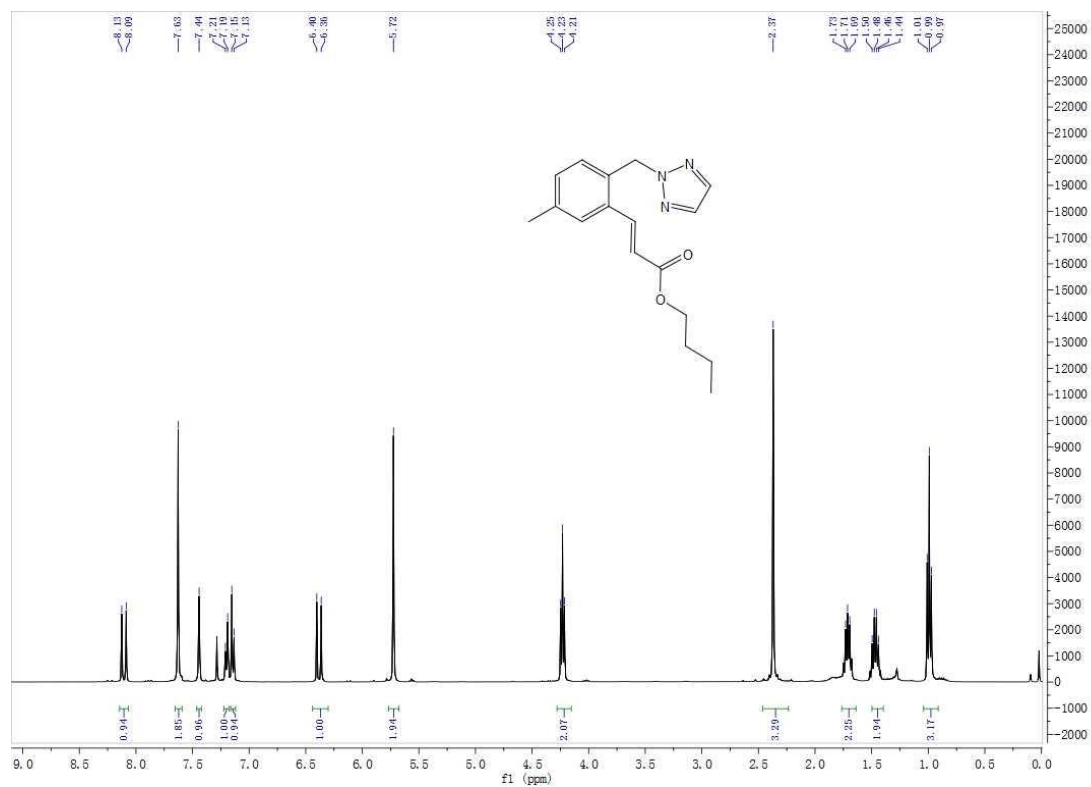

<sup>13</sup>C-3p

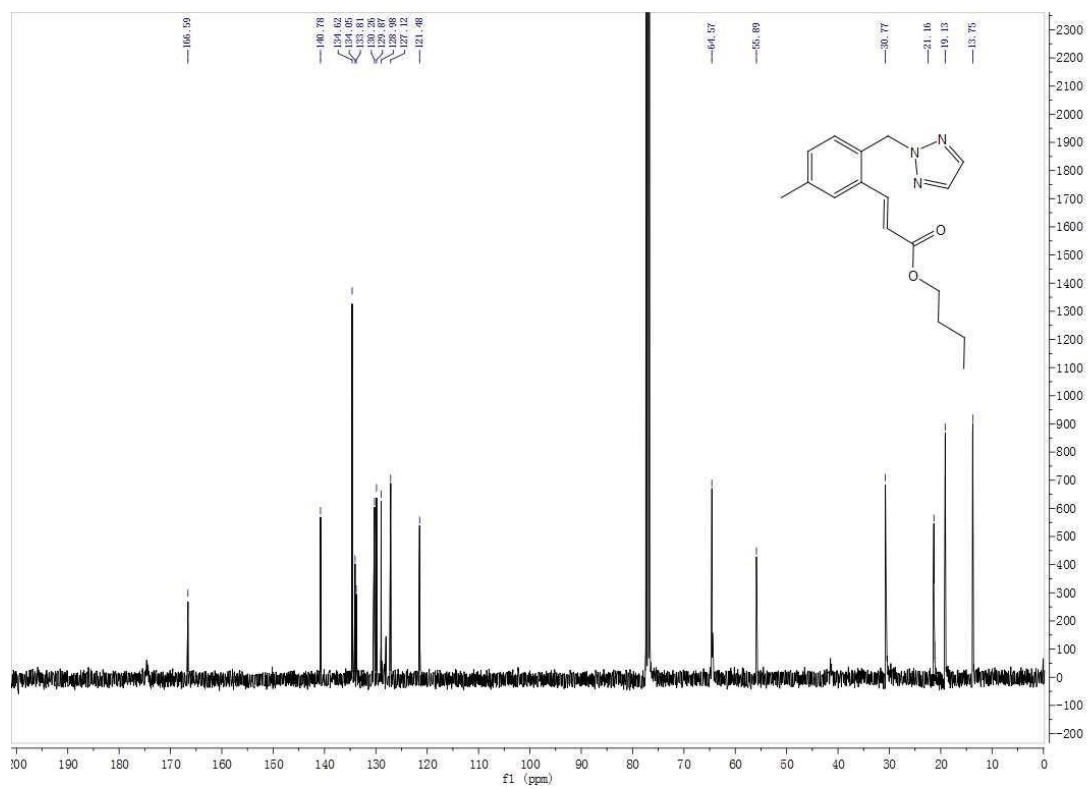

Supplement: c5ob00973a1.pdf [file c5ob00973a1.pdf]
